# 1 **SAMHD1 limits the efficacy of forodesine in leukaemia by** 2 **protecting cells against cytotoxicity of dGTP**

3 Tamara Davenne<sup>1,5</sup>, Jenny Klintman<sup>2</sup>, Sushma Sharma<sup>3</sup>, Rachel E. Rigby<sup>1</sup>, Chiara  
4 Cursi<sup>1</sup>, Anne Bridgeman<sup>1</sup>, Bernadeta Dadonaite<sup>4</sup>, Kim De Keersmaecker<sup>5</sup>, Peter  
5 Hillmen<sup>6</sup>, Andrei Chabes<sup>3</sup>, Anna Schuh<sup>2,7,8</sup> and Jan Rehwinkel<sup>1,9,\*</sup>

6

7 <sup>1</sup>Medical Research Council Human Immunology Unit, Medical Research Council  
8 Weatherall Institute of Molecular Medicine, Radcliffe Department of Medicine,  
9 University of Oxford, Oxford OX3 9DS, UK.

10 <sup>2</sup>Molecular Diagnostic Centre, Department of Oncology, University of Oxford, Oxford,  
11 UK.

12 <sup>3</sup>Department of Medical Biochemistry and Biophysics and Laboratory for Molecular  
13 Infection Medicine Sweden (MIMS), Umeå University, Umeå, Sweden.

14 <sup>4</sup>Sir William Dunn School of Pathology, University of Oxford, South Parks Road,  
15 Oxford OX1 3RE, UK.

16 <sup>5</sup>Laboratory for Disease Mechanisms in Cancer, Department of Oncology, KU Leuven  
17 and Leuven Cancer Institute (LKI), Herestraat 49, 3000 Leuven, Belgium.

18 <sup>6</sup>St James' Institute of Oncology, St James' University Hospital, Leeds, UK.

19 <sup>7</sup>Department of Oncology, Old Road Campus Research Building, University of Oxford,  
20 OX3 7DQ, UK.

21 <sup>8</sup>Department of Haematology, Oxford University Hospitals NHS Trust, Oxford, UK.

22 <sup>9</sup>Lead Contact

23

24 \* Correspondence: [jan.rehwinkel@imm.ox.ac.uk](mailto:jan.rehwinkel@imm.ox.ac.uk); +44 1865 222362

25

## 26 **Keywords**

27 SAMHD1, dNTP, deoxyguanosine, dGTP, apoptosis, CyTOF, forodesine, BCX-1777,  
28 Immucillin H, chronic lymphocytic leukaemia

29

## 30 **Running title**

31 SAMHD1 protects against dGTP toxicity

## 32 Graphical Abstract

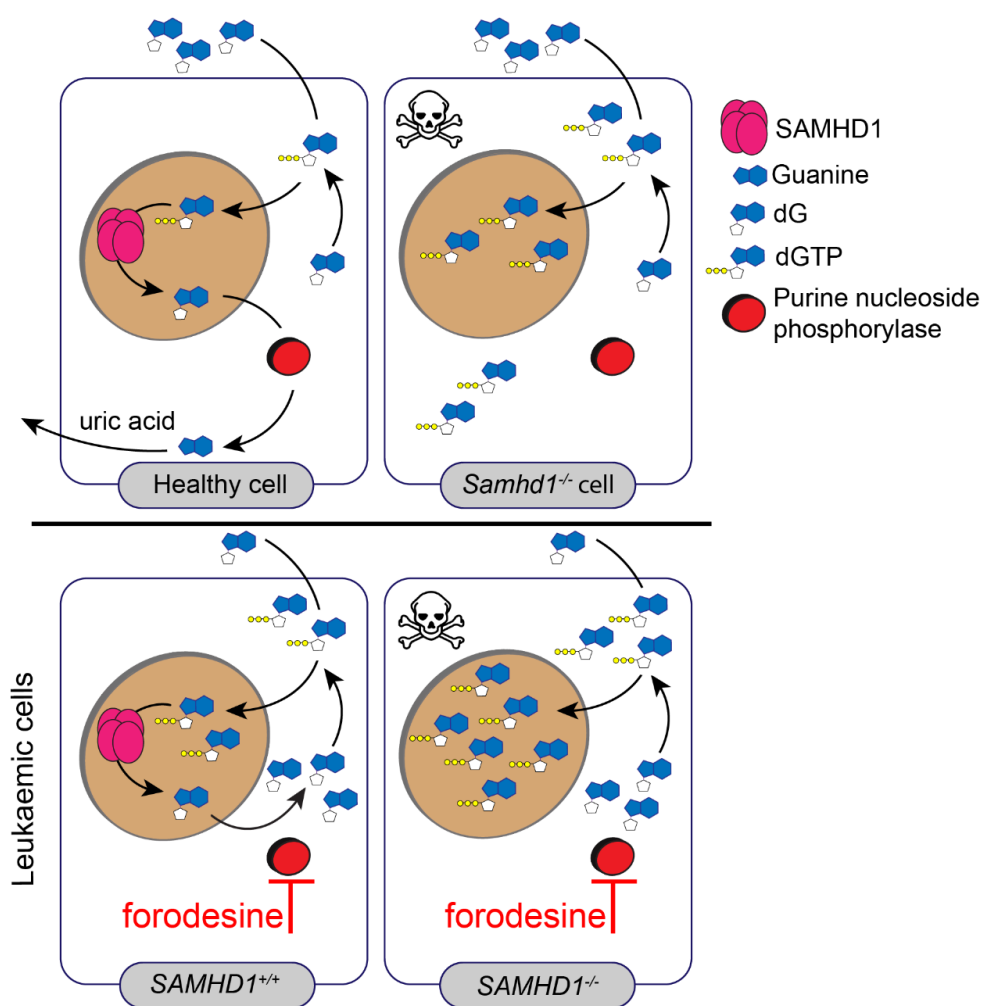

33

34

## 35 Highlights

- 36 • SAMHD1-deficient cells die upon exposure to deoxyribonucleosides (dNs)
- 37 • Deoxyguanosine (dG) is the most toxic dN, inducing apoptosis in cells lacking SAMHD1
- 38
- 39 • SAMHD1-mutated leukaemic cells can be killed by dG and the PNP-inhibitor
- 40 forodesine

41

## 42 In Brief

43 SAMHD1 degrades deoxyribonucleoside triphosphates (dNTPs), the building blocks  
 44 of DNA. Davenne et al. found that SAMHD1 protects cells against dNTP imbalances.  
 45 Exposure of SAMHD1-deficient cells to deoxyguanosine (dG) results in increased  
 46 intracellular dGTP levels and subsequent apoptosis. This can be exploited to  
 47 selectively kill cancer cells that acquired SAMHD1 mutations.

48 **Summary**

49 The anti-leukaemia agent forodesine causes cytotoxic overload of intracellular  
50 deoxyguanosine triphosphate (dGTP) but is efficacious only in a subset of patients.  
51 We report that SAMHD1, a phosphohydrolase degrading deoxyribonucleoside  
52 triphosphates (dNTPs), protected cells against the effects of dNTP imbalances.  
53 SAMHD1-deficient cells induced intrinsic apoptosis upon provision of  
54 deoxyribonucleosides, particularly deoxyguanosine (dG). Moreover, dG and  
55 forodesine acted synergistically to kill cells lacking SAMHD1. Using mass cytometry,  
56 we found that these compounds killed SAMHD1-deficient malignant cells from patients  
57 with chronic lymphocytic leukaemia (CLL). Normal cells and CLL cells from patients  
58 without *SAMHD1* mutation were unaffected. We therefore propose to use forodesine  
59 as a precision medicine for leukaemia, stratifying patients by *SAMHD1* genotype or  
60 expression.

## 61 Introduction

62 Intracellular deoxyribonucleoside triphosphate (dNTP) concentrations are controlled  
63 by dNTP synthesis and degradation. dNTPs are supplied by two pathways known as  
64 de novo and salvage. In the de novo pathway, dNTPs are synthesised from  
65 intracellular precursors. The enzyme ribonucleotide reductase catalyses the rate  
66 limiting step and converts ribonucleoside diphosphates into deoxyribonucleoside  
67 diphosphates (Hofer et al., 2012). The salvage pathway involves uptake of  
68 deoxyribonucleosides (dNs) from the extracellular environment, followed by  
69 intracellular phosphorylation by cytosolic and mitochondrial kinases to form dNTPs  
70 (Eriksson et al., 2002; Inoue, 2017; Reichard, 1988).

71 One enzyme degrading intracellular dNTPs is the phosphohydrolase SAMHD1,  
72 initially identified as an interferon  $\gamma$ -inducible transcript in dendritic cells (Li et al., 2000).  
73 SAMHD1 cleaves all four dNTPs into the corresponding dNs and inorganic  
74 triphosphate (Goldstone et al., 2011; Powell et al., 2011). The catalytically active form  
75 of the protein is a homo-tetramer, formation of which is regulated allosterically by  
76 dNTPs and guanosine triphosphate (GTP) as well as by phosphorylation of threonine  
77 592 (reviewed in: Ahn, 2016; Ballana and Este, 2015). SAMHD1 has been studied  
78 extensively in the context of human immunodeficiency virus (HIV) infection. By limiting  
79 the supply of dNTPs for the viral reverse transcriptase, SAMHD1 blocks HIV infection  
80 in certain cell types (Hrecka et al., 2011; Laguette et al., 2011; Lahouassa et al., 2012;  
81 Rehwinkel et al., 2013). *SAMHD1* mutations cause Aicardi-Goutières syndrome, a  
82 rare autoinflammatory disease characterised by chronic production of type I  
83 interferons, a family of cytokines typically upregulated only during acute virus infection  
84 (Crow and Manel, 2015; Rice et al., 2009). Furthermore, mutations in the *SAMHD1*  
85 gene have been found in several types of cancer, including colorectal cancer and  
86 leukaemias (Clifford et al., 2014; Johansson et al., 2018; Rentoft et al., 2016; Schuh  
87 et al., 2012). It is possible that inactivation of SAMHD1 provides transformed cells with  
88 a growth advantage simply due to elevated dNTP levels. Alternatively, the role of  
89 SAMHD1 in cancer may relate to its functions in DNA repair and DNA replication,  
90 which are independent of dNTP degradation (Clifford et al., 2014; Coquel et al., 2018;  
91 Daddacha et al., 2017).

92 Chronic lymphocytic leukaemia (CLL) is a very common form of adult leukaemia and  
93 affects the elderly (Swerdlow, 2008). Refractoriness to chemotherapy and relapse



94 remain major causes of death of patients with CLL. Nucleotide metabolism is an  
95 attractive target for the treatment of CLL and other leukaemias. The small molecule  
96 forodesine (also known as Immucillin H or BCX-1777) was developed to inhibit purine  
97 nucleoside phosphorylase (PNP) (Kicska et al., 2001). PNP degrades  
98 deoxyguanosine (dG) into guanine, which is further catabolised into uric acid that is  
99 released by cells (Gabrio et al., 1956). dG has cytotoxic properties (Dahbo and  
100 Eriksson, 1985; Mann and Fox, 1986; Theiss et al., 1976) and genetic PNP deficiency  
101 causes immunodeficiency and results in loss of T cells and in some patients also  
102 affects B cell function (Markert, 1991). Upon forodesine treatment, dG accumulates  
103 intracellularly and is phosphorylated to deoxyguanosine triphosphate (dGTP). The  
104 resulting imbalance in dNTP pools is predicted to cause cell death and to eliminate  
105 leukaemic cells (Bantia et al., 2001). Furthermore, synergy between dG and  
106 forodesine in inducing cell death in vitro has been suggested (Bantia et al., 2003) and,  
107 in patients, forodesine treatment increases plasma dG levels (Balakrishnan et al.,  
108 2006; Balakrishnan et al., 2010). Forodesine showed promising results in vitro in killing  
109 CLL B cells; surprisingly, however, it had substantial activity only in a small subset of  
110 patients with B or T cell malignancies (Alonso et al., 2009; Balakrishnan et al., 2006;  
111 Balakrishnan et al., 2010; Dummer et al., 2014; Gandhi and Balakrishnan, 2007;  
112 Gandhi et al., 2005; Maruyama et al., 2018).

113 Here, we explored the role of SAMHD1 in dNTP metabolism. We report that SAMHD1  
114 protected cells against imbalances in dNTP pools. In cells lacking SAMHD1,  
115 engagement of the salvage pathway resulted in programmed cell death. Exposure to  
116 dG was particularly potent at inducing intrinsic apoptosis in SAMHD1-deficient primary  
117 and transformed cells. We further show that forodesine and other PNP inhibitors acted  
118 synergistically with dG to induce death in cells lacking SAMHD1. Importantly,  
119 *SAMHD1*-mutated leukaemic cells from patients with CLL were selectively killed by  
120 forodesine and dG. This showed that SAMHD1 was limiting the potency of forodesine.  
121 It may therefore be possible to stratify patients with leukaemia for forodesine treatment  
122 by *SAMHD1* genotype or expression.

123

## 124 **Results**

### 125 **SAMHD1 protects cells against dNTP overload**

126 To investigate the role of SAMHD1 in dNTP metabolism, we added equimolar  
127 concentrations of dNs to wild-type (WT) or SAMHD1-deficient cells. Surprisingly, wide-  
128 spread cell death was apparent by bright-field microscopy in cells lacking SAMHD1,  
129 but not in control cells after over-night incubation with dNs (data not shown). To study  
130 this phenotype systematically, we analysed mouse embryonic fibroblasts (MEFs),  
131 mouse bone marrow-derived macrophages (BMDMs) and primary human fibroblasts.  
132 Cell viability was assessed using a luminescence-based assay for intracellular ATP  
133 levels (CellTiter-Glo). We observed reduced viability of dN-exposed *Samhd1*<sup>-/-</sup> MEFs  
134 and BMDMs, as well as of human fibroblasts from a patient with AGS homozygously  
135 carrying the Q149X nonsense mutation in *SAMHD1* (Figure 1A). Viability of WT mouse  
136 and control human cells, including fibroblasts from patients with AGS carrying other  
137 AGS-causing mutations in *IFIH1* or *ADAR1*, was largely unaltered after addition of  
138 dNs. To confirm that the absence of SAMHD1 renders cells susceptible to dN-induced  
139 cell death, we reconstituted BMDMs with a retrovirus expressing mouse SAMHD1.  
140 Indeed, expression of SAMHD1 in *Samhd1*<sup>-/-</sup> cells rescued viability after treatment with  
141 dNs (Figure 1B,C).

142 Next, we exposed BMDMs to increasing concentrations of dNs. We observed dose-  
143 dependent toxicity in *Samhd1*<sup>-/-</sup> cells, but not in WT cells, starting at ~0.1 mM dNs  
144 (Figure 1D). To determine if this effect was due to a specific dN, we treated BMDMs  
145 with single dNs. Interestingly, the highest toxicity in *Samhd1*<sup>-/-</sup> cells was observed  
146 when dG was used (Figure 1D). Like dG treatment, dA also reduced viability  
147 specifically in SAMHD1-deficient cells, but at higher doses: a 50% reduction in  
148 intracellular ATP levels was observed with ~0.1 mM dG and with ~1 mM dA (Figure  
149 1D). Of note, dG also caused toxicity in WT cells at high doses above 5 mM (Figure  
150 1D). We also tested dN combinations using a fixed dose of 0.5 mM. dG was the most  
151 toxic dN in *Samhd1*<sup>-/-</sup> cells when used alone or in combination with dA and/or  
152 thymidine, whilst presence of dC reduced the effect of dG on cell viability (Figure 1E).  
153 We therefore focussed on dG in subsequent experiments at doses that do not reduce  
154 viability in WT cells. Bright-field images, crystal violet staining and live-cell imaging  
155 confirmed the toxicity of dG in *Samhd1*<sup>-/-</sup> cells (Figure 1F-H). In line with earlier work  
156 (Behrendt et al., 2013; Rehwinkel et al., 2013), measurement of intracellular dNTP  
157 concentrations showed that the levels of all four dNTPs were elevated in *Samhd1*<sup>-/-</sup>

158 cells (Figure 1I,J). Importantly, dG treatment resulted in 46- and 6-fold increases in  
159 dGTP concentrations in *Samhd1*<sup>-/-</sup> BMDMs and MEFs, respectively, while dGTP levels  
160 stayed largely unchanged in WT cells (Figure 1I,J). Taken together, these data show  
161 that exposure to dG led to dGTP accumulation in cells lacking SAMHD1, subsequently  
162 resulting in cell death.

163

### 164 **dG treatment induces apoptosis in *Samhd1*<sup>-/-</sup> cells**

165 We next determined the type of cell death triggered by dNs in *Samhd1*<sup>-/-</sup> cells. Annexin  
166 V and 7AAD staining showed an increased frequency of early apoptotic  
167 (AnnexinV<sup>+</sup>7AAD<sup>-</sup>) and dead (AnnexinV<sup>+</sup>7AAD<sup>+</sup>) cells in dN-treated *Samhd1*<sup>-/-</sup> BMDM  
168 cultures (Figure 2A). Using the Caspase-Glo assay to measure activity of apoptotic  
169 caspases, we found that addition of dG to *Samhd1*<sup>-/-</sup> BMDMs, but not to WT cells,  
170 activated caspase 3/7 (Figure 2B). Live cell imaging revealed that *Samhd1*<sup>-/-</sup> BMDMs  
171 treated with dG stained positive for Annexin V around 5 hours post-treatment and  
172 subsequently for propidium iodide (PI) (Figure 2C). These observations suggest that  
173 dG treatment induced apoptosis, followed by secondary necrosis rendering cells  
174 permeable to PI. Quantification of AnnexinV<sup>+</sup>PI<sup>+</sup> cells by microscopy 24 hours after dG  
175 exposure affirmed increased levels of dead *Samhd1*<sup>-/-</sup> BMDMs (Figure 2D). Cleaved  
176 caspase 3 was detectable by western blot in *Samhd1*<sup>-/-</sup> but not WT BMDMs, supporting  
177 the notion that dG induced apoptosis (Figure 2E). Cycloheximide (CHX) served as a  
178 control in these experiments and induced caspase 3 cleavage in WT and *Samhd1*<sup>-/-</sup>  
179 cells. Cytochrome C is normally present in mitochondria and is released into the  
180 cytosol early during intrinsic apoptosis. To characterise the apoptosis pathway  
181 activated by dG-treatment, we measured cytochrome C levels in the cytosol and found  
182 that treatment of *Samhd1*<sup>-/-</sup> BMDMs with dG lead to a redistribution of cytochrome C  
183 into the cytosol (Figure 2F). To investigate whether a soluble factor was triggering  
184 apoptosis, we co-cultured WT and *Samhd1*<sup>-/-</sup> BMDMs and treated them with dG.  
185 Viability decreased with increasing proportions of *Samhd1*<sup>-/-</sup> cells present in the co-  
186 culture, suggesting that apoptosis was induced in a cell-autonomous fashion (Figure  
187 2G). In sum, these results show that dG triggered intrinsic apoptosis in *Samhd1*<sup>-/-</sup> cells.

188

### 189 **Nuclear DNA replication is not required for dG-induced apoptosis**

190 Earlier work in yeast showed that severe dNTP pool imbalances can trigger stalled  
191 replication forks and checkpoint activation (Kumar et al., 2011; Poli et al., 2012). To

192 study the role of DNA replication in dG-induced death of SAMHD1-deficient cells, we  
193 analysed cell cycle progression in BMDMs by BrdU and PI staining after dG treatment.  
194 Untreated WT and *Samhd1*<sup>-/-</sup> BMDM cultures contained ~20% BrdU<sup>+</sup> cells, indicative  
195 of cells in S-phase with ongoing DNA replication (Supplementary Figure 1A). After dG  
196 treatment, WT cells already in S-phase progressed through the cell cycle. At the same  
197 time, new cells did not enter S-phase, resulting in a much-reduced population of BrdU<sup>+</sup>  
198 cells after 24 hours of dG exposure. In contrast, *Samhd1*<sup>-/-</sup> cells in S-phase did not  
199 progress. Instead, a population of cells displaying sub-G0/G1 PI staining, indicative of  
200 dead cells that lost their nucleic acid content, was detected in *Samhd1*<sup>-/-</sup> cultures,  
201 starting at 8 hours after dG treatment (Supplementary Figure 1A). Next, we performed  
202 a BrdU pulse-chase experiment, in which we labelled BMDMs with BrdU first and then  
203 treated with dG. Over time, WT cultures accumulated a distinct population of G0/G1-  
204 BrdU<sup>+</sup> cells and contained fewer cells in S-phase (Supplementary Figure 1B). This  
205 confirmed that WT cells progressed through the cell cycle but did not enter S-phase.  
206 In *Samhd1*<sup>-/-</sup> cultures, cells with sub-G0/G1 PI staining were evident from 8 hours  
207 onwards. These included both BrdU<sup>+</sup> and BrdU<sup>-</sup> cells, suggesting that dG treatment  
208 killed both cycling and non-cycling *Samhd1*<sup>-/-</sup> cells (Supplementary Figure 1B). We  
209 therefore tested whether DNA replication was required for the toxicity of dG in  
210 *Samhd1*<sup>-/-</sup> cells. BMDMs were cultured in serum-free medium (R0) or were pre-treated  
211 with hydroxyurea (HU), both of which induced cell cycle arrest, evident from reduced  
212 numbers of cells in S-phase (Supplementary Figure 1C). *Samhd1*<sup>-/-</sup> cells arrested by  
213 both methods were susceptible to killing by dG (Supplementary Figure 1D,E). We also  
214 pre-treated BMDMs with aphidicolin (APD) that blocks nuclear but not mitochondrial  
215 DNA polymerases (Lentz et al., 2010; Zimmermann et al., 1980). As expected, APD-  
216 treated cells were arrested in early S-phase (Supplementary Figure 1F). Interestingly,  
217 APD-treated cells were susceptible to dG-induced toxicity (Supplementary Figure 1G).  
218 Finally, we assessed oxidative stress by measuring levels of the reactive oxygen  
219 species H<sub>2</sub>O<sub>2</sub> and found that dG treatment of WT and SAMHD1-deficient BMDMs did  
220 not induce oxidative stress (Supplementary Figure 1H). As a control, we used  
221 menadione that induced equivalent H<sub>2</sub>O<sub>2</sub> levels in cells irrespective of their genotype.  
222 Together, these data suggest that dG-induced apoptosis occurred independently of  
223 nuclear DNA replication and oxidative stress, and that dGTP overload was toxic in  
224 both cycling and non-cycling *Samhd1*<sup>-/-</sup> cells.

225

## 226 **dG treatment kills SAMHD1-deficient cancer cells**

227 *SAMHD1* mutations are present in several types of cancer and in many cases result  
228 in reduced mRNA and protein levels (Clifford et al., 2014; Johansson et al., 2018;  
229 Rentoft et al., 2016). We therefore wished to explore our finding of dN-induced cell  
230 death in the context of malignant disease. Initially, we tested cancer cell lines. Vpx is  
231 a HIV-2 accessory protein that targets SAMHD1 for proteasomal degradation (Hrecka  
232 et al., 2011; Laguette et al., 2011). We used virus-like particles (VLPs) containing Vpx  
233 to deplete SAMHD1 in the cervical cancer cell line HeLa, in the monocytic cell line  
234 THP1 and in the breast cancer cell line MDA-MB231, all of which express SAMHD1.  
235 Cells treated with VLP<sub>vpx</sub>, but not with control VLPs lacking Vpx (VLP<sub>ctrl</sub>), showed  
236 reduced viability upon addition of dNs or dG (Figure 3A-D). SAMHD1 staining and  
237 analysis by flow cytometry confirmed the efficiency of SAMHD1 depletion using VLP<sub>vpx</sub>  
238 (Supplementary Figure 2A,B). In addition, we generated a *Samhd1*<sup>-/-</sup> B16F10 mouse  
239 melanoma cell line using CRISPR/Cas9 (strategy and validation shown in  
240 Supplementary Figure 2C,D). *Samhd1*<sup>-/-</sup> B16F10 cells showed increased frequencies  
241 of early apoptotic (AnnexinV<sup>+</sup>7AAD<sup>-</sup>) and dead (AnnexinV<sup>+</sup>7AAD<sup>+</sup>) cells upon dG  
242 treatment, accompanied by reduced confluency (Figure 3E-G and Supplementary  
243 Figure 2E). We made similar observations in the murine colorectal cancer cell line  
244 CT26 upon SAMHD1 knock-out (data not shown). We also included Jurkat cells in our  
245 analysis, a human T-cell line that, in contrast to the other cell lines utilized, does not  
246 express SAMHD1 (Baldauf et al., 2012). Jurkat cells were exquisitely sensitive to dG  
247 treatment at doses approximately 10 times lower than those used in most other  
248 experiments (Figure 3H). We confirmed the killing of Jurkat cells by testing their  
249 clonogenic potential, which was greatly reduced upon dG treatment (Figure 3I).  
250 Reconstitution with a lentivirus expressing human SAMHD1 partially rescued viability  
251 upon dG treatment (Figure 3J,K). Interestingly, SAMHD1 K11A, which does not  
252 localise to the cell nucleus (Schaller et al., 2014), executed an even more pronounced  
253 rescue as compared to WT SAMHD1. In sum, SAMHD1 protected cancer cell lines  
254 against dN-triggered toxicity.

255

## 256 **SAMHD1 protects against combined forodesine and dG treatment**

257 Forodesine is an inhibitor of PNP, which converts dG into guanine and  $\alpha$ -D-ribose 1-  
258 phosphate, and has been shown to induce apoptosis in leukaemic cells, possibly by

259 increasing the intracellular and plasma concentrations of dG and consequently  
260 intracellular dGTP (Balakrishnan et al., 2010; Bantia et al., 2010; Kicska et al., 2001;  
261 Posmantur et al., 1997). Our system – in which SAMHD1-deficient cells fed with dG  
262 died by apoptosis due to dGTP overload – resembled this situation. We therefore  
263 hypothesised that forodesine and dG might work synergistically in SAMHD1-deficient  
264 cells. Indeed, low doses of dG or forodesine alone did not compromise viability of WT  
265 or *Samhd1*<sup>-/-</sup> BMDMs while the combination of both was toxic in *Samhd1*<sup>-/-</sup> cells (Figure  
266 4A,B). We confirmed this observation using 10 μM dG and 1 μM forodesine at (i)  
267 different time points, (ii) with crystal violet staining and (iii) biochemically by cleavage  
268 of PARP and CASPASE3 (Figure 4C-F). Jurkat cells treated with the same doses of  
269 forodesine and dG showed increased proportions of AnnexinV<sup>+</sup>7AAD<sup>-</sup> cells, and this  
270 was prevented when SAMHD1 or SAMHD1 K11A were expressed (Figure 4G-I). Vice  
271 versa, SAMHD1-sufficient Hela cells were sensitised to combined forodesine and dG  
272 treatment by Vpx-mediated depletion of SAMHD1 (Figure 4J).

273 To further study the synergy between forodesine and dG in cells lacking SAMHD1, we  
274 titrated forodesine and dG. Forodesine alone had no effect on viability of *Samhd1*<sup>-/-</sup>  
275 BMDMs, including at high doses (Figure 4K, closed symbols). In contrast, dG triggered  
276 dose-dependent toxicity in the presence of 1 μM forodesine in *Samhd1*<sup>-/-</sup> cells but not  
277 in WT cells (Figure 4K, open symbols). Comparing the dose-response to dG in the  
278 presence or absence of forodesine revealed that forodesine sensitised SAMHD1-  
279 deficient BMDMs to dG by approximately 10-fold (Figure 4L).

280 Finally, we tested whether other PNP inhibitors might induce death of SAMHD1-  
281 deficient cells in the presence of dG. Indeed, BMDMs showed reduced viability upon  
282 exposure to either homo-DFPP-DG or 6C-DFPP-DG (Glavas-Obrovac et al., 2010;  
283 Hikishima et al., 2007, 2010) together with low doses of dG (Figure 4M,N). Taken  
284 together, these data showed that SAMHD1 protected cells against death that was  
285 synergistically induced by PNP inhibitors and dG. Thus, our observations revealed a  
286 key role of SAMHD1 in the mechanism underlying the toxicity of compounds such as  
287 forodesine.

288

289 **CLL B cells with *SAMHD1* mutations are highly sensitive to a combination**  
290 **treatment of forodesine and dG**



291 *SAMHD1* is mutated in 11% of patients with refractory CLL (Clifford et al., 2014). Since  
292 *SAMHD1* protected cells against treatment with forodesine and dG (Figure 4), we  
293 hypothesised that CLL B cells with *SAMHD1* mutations would be particularly  
294 susceptible to this combination treatment. To test this, we compared the effect of  
295 forodesine and dG treatment on peripheral blood mononuclear cells (PBMCs) from  
296 patients with CLL with or without acquired mutations in *SAMHD1*.

297 Details of the patients' cells genetic status and *SAMHD1* mutations are shown in  
298 Supplementary Figure 3A,B. PBMCs from patients with CLL were treated with 2  $\mu$ M  
299 forodesine, 20  $\mu$ M dG, or both. When used alone, neither forodesine nor dG  
300 significantly reduced cell viability assessed by intracellular ATP content (Figure 5A).  
301 The combination of both compounds had little effect on viability of PBMCs from  
302 patients without *SAMHD1* mutations. However, significantly reduced PBMC viability  
303 was observed in the *SAMHD1*-mutated group (Figure 5A). These data were confirmed  
304 by flow cytometry: the population of live cells was selectively reduced after forodesine  
305 and dG treatment of PBMCs from *SAMHD1* mutated patients (data not shown).

306 To investigate which types of cells were affected by exposure to forodesine and dG,  
307 we used cytometry by time of flight (CyTOF) analysis. PBMCs from healthy control  
308 subjects and patients with CLL were treated or not with both compounds. After  
309 treatment, cells were stained with a panel of antibodies recognising cell surface  
310 markers to identify cell types. *SAMHD1* expression, phosphorylation of NF $\kappa$ B-p65, p38  
311 and STAT1, as well as cleavage of PARP and CASPASE3 were also monitored by  
312 intracellular staining. CLL B cells are marked by co-expression of CD5 and CD19  
313 (Swerdlow, 2008). As expected, CD5<sup>+</sup>CD19<sup>+</sup> cells (CLL B cells) were largely absent  
314 from control PBMCs and could be detected at varying frequencies in samples from  
315 patients with CLL, irrespective of *SAMHD1* genotype (Figure 5B,C and Supplementary  
316 Figure 3C,D). We also analysed *SAMHD1* expression in CLL B cells. Variable  
317 expression of *SAMHD1* was observed in the *SAMHD1* non-mutated group, whilst CLL  
318 B cells from the *SAMHD1* mutated group had no detectable levels of *SAMHD1* (Figure  
319 5D and Supplementary Figure 3C). This shows that the *SAMHD1* mutations studied  
320 here resulted in a loss of *SAMHD1* protein, in line with our earlier observations (Clifford  
321 et al., 2014).

322 Next, we analysed our CyTOF data using viSNE (Amir el et al., 2013; Kimball et al.,  
323 2018). This analysis tool uses the t-distributed stochastic neighbour embedding

324 (tSNE) algorithm and displays high-dimensional data on a two-dimensional map. Each  
325 dot on a viSNE plot corresponds to a cell. Colour can be used to show expression of  
326 a chosen parameter. We generated viSNE plots after gating on CLL B cells (Figure  
327 5E and Supplementary Figure 4). tSNE maps showed a marked reduction of CLL B  
328 cells upon forodesine and dG treatment in cells from *SAMHD1*-mutated patients but  
329 not in the *SAMHD1* wild-type groups (Figure 5E and Supplementary Figure 4). Gating  
330 on CLL B cells also confirmed that forodesine and dG treatment resulted in their  
331 selective loss in the *SAMHD1*-mutated group while there was no effect on the same  
332 cell population in the *SAMHD1* non-mutated group (Figure 5F). Significantly increased  
333 levels of cleaved PARP and cleaved CASPASE3 were observed only in *SAMHD1*-  
334 mutated CLL B cells post-treatment, consistent with the induction of apoptosis (Figure  
335 5G,H).

336 Interestingly, forodesine and dG ablated a subpopulation of *SAMHD1* mutated CLL B  
337 cells, which appeared to be characterised by high levels of NF $\kappa$ B-p65, p38 and STAT1  
338 phosphorylation (Figure 5E and Supplementary Figure 4). Using phosphorylated (p-)  
339 p38, a MAP kinase, we defined “active” and “inactive” cells and analysed the  
340 expression of selected markers in these subpopulations (Supplementary Figure 5A).  
341 This analysis confirmed that p-p38 positive cells also displayed higher levels of p-p65  
342 and p-STAT1 and revealed higher levels of CD27 expression in these “active” cells,  
343 which may indicate engagement of the B cell receptor (Lafarge et al., 2015).  
344 Interestingly, staining for cleaved PARP and cleaved CASPASE3 was enhanced more  
345 strongly in “inactive” cells upon treatment (Supplementary Figure 5B,C). This suggests  
346 that these “inactive” CLL B cells were also affected by the treatment and induced  
347 apoptosis with delayed kinetics compared to “active” cells.

348 Collectively, these data show that forodesine and dG were highly efficient at killing  
349 malignant CLL B cells with *SAMHD1* mutations that cause a defect in *SAMHD1*  
350 expression, while cells with intact *SAMHD1* expression were spared.

351



## 352 Discussion

353 Our data reveal an unexpected role of SAMHD1 in safeguarding cells against cell  
354 death resulting from imbalances in dNTP pools. In the absence of SAMHD1, dNTP  
355 imbalances induced by exposure of cells to dNs triggered apoptosis. This phenotype  
356 was observed in a wide range of human and mouse cells, including primary and  
357 transformed cells. We further show synergy between dG exposure and forodesine,  
358 which blocks dG degradation by PNP, in cells lacking SAMHD1. Importantly, the  
359 combination of dG and forodesine selectively killed SAMHD1-deficient CLL B cells,  
360 while other normal cells or SAMHD1-sufficient CLL B cells remained unaffected.

361 Since its identification as a restriction factor for HIV (Hrecka et al., 2011; Laguette et  
362 al., 2011), SAMHD1 has been studied extensively in the context of lentiviral infections.  
363 Interestingly, SAMHD1 is highly conserved from marine invertebrates to man (Rice et  
364 al., 2009), whereas lentiviruses evolved much more recently. This suggests that  
365 restriction of lentiviral infection is an exaptation of SAMHD1's biochemical activity to  
366 degrade dNTPs, which perhaps has a more ancestral function in cellular dNTP  
367 metabolism. We propose that this evolutionarily conserved function of SAMHD1 is to  
368 correct imbalances in dNTP pools, thereby safeguarding against cell death. Indeed,  
369 we report that intracellular dNTP concentrations were only marginally altered in WT  
370 cells exposed to extracellular dNs, while SAMHD1-deficient cells accumulated large  
371 dNTP pools. Concomitantly, cells lacking SAMHD1 succumbed to apoptotic cell death.  
372 Interestingly, dG was the most toxic dN. This may be related to the observation that  
373 baseline dGTP concentrations are lower than those of the three other dNTPs, resulting  
374 in particularly pronounced dNTP imbalances upon dG feeding. In addition, dGTP  
375 allosterically regulates ribonucleotide reductase, preventing dCTP production through  
376 the de novo pathway (Moore and Hurlbert, 1966). Consistent with this idea is our  
377 observation that the toxicity of dG was reduced when added together with dC,  
378 providing dCTP via the salvage pathway. In addition, dC may indirectly increase dTTP  
379 concentrations via a pathway involving dCMP deaminase and thymidylate synthase  
380 (Theiss et al., 1976), thereby balancing dNTP levels.

381 The precise molecular mechanism by which dNTP imbalances in SAMHD1-deficient  
382 cells result in apoptosis remains to be fully elucidated. We observed release of  
383 cytochrome C from mitochondria into the cytosol, indicative of cell-intrinsic apoptosis.  
384 This notion was supported by the observation that cell death in mixed cultures  
385 containing WT and *Samhd1*<sup>-/-</sup> cells was proportional to the fraction of knock-out cells.

386 We further found that dN-triggered cell death did not require ongoing nuclear DNA  
387 synthesis. It is therefore possible that dNTP imbalances disrupt replication or repair of  
388 mitochondrial DNA, resulting in mitochondrial stress and subsequent apoptosis  
389 (Arpaia et al., 2000; Franzolin et al., 2015). Alternatively, dGTP may be involved more  
390 directly in the activation of apoptosis as has been reported for dATP (Li et al., 1997;  
391 Reubold et al., 2009).

392 Clinical trials showed that forodesine has beneficial effects in some but not all patients  
393 with B or T cell malignancies (Alonso et al., 2009; Balakrishnan et al., 2006;  
394 Balakrishnan et al., 2013; Balakrishnan et al., 2010; Dummer et al., 2014; Gandhi and  
395 Balakrishnan, 2007; Gandhi et al., 2005; Maruyama et al., 2018; Ogura et al., 2012),  
396 an observation that thus far has lacked an explanation. Our data suggest that  
397 forodesine-sensitive leukaemias harbour mutations that ablate SAMHD1 expression  
398 or inactivate its enzymatic activity. It may therefore be possible to stratify patients by  
399 *SAMHD1* genotype or expression levels. Retrospective analysis of previous clinical  
400 trials with forodesine could lend support for this idea. However, restricted sample  
401 availability, limited consent to obtain genetic information and small trial sizes have  
402 precluded this approach. Instead, future clinical trials should be conducted to  
403 determine whether the efficacy of forodesine can be predicted by the presence or  
404 absence of SAMHD1 in transformed cells. Survival of PBMCs ex vivo upon forodesine  
405 and dG treatment (Figure 5A) and commercially available  $\alpha$ -SAMHD1 antibodies  
406 would be suitable for rapid clinical assays to identify patients with SAMHD1 deficiency.  
407 Previous studies reported that dG needs to be added in combination with forodesine  
408 to induce toxicity in vitro (Alonso et al., 2009; Balakrishnan et al., 2006; Bantia et al.,  
409 2001; Gandhi and Balakrishnan, 2007; Gandhi et al., 2005). In patients, forodesine  
410 treatment alone has been shown to increase plasma dG levels (Balakrishnan et al.,  
411 2006; Balakrishnan et al., 2010). However, it may also be interesting to explore  
412 supplementing forodesine with dG in patients with leukaemia with acquired *SAMHD1*-  
413 mutations. It is noteworthy that SAMHD1 is broadly expressed in most normal human  
414 tissues (Schmidt et al., 2015; Uhlen et al., 2015). As such, forodesine and dG are  
415 unlikely to have negative effects on healthy cells.

416 Our CyTOF analysis revealed that CLL B cells identified by CD19 and CD5 staining  
417 contained two sub-populations of cells, distinguishable by expression of CD27 and  
418 phosphorylation of p65, p38 and STAT1. Activation of NF $\kappa$ B, MAP kinase and STAT

419 signalling pathways has been reported in CLL (Frank et al., 1997; Herishanu et al.,  
420 2011; Ringshausen et al., 2004; Shukla et al., 2018) and CD27 is upregulated in  
421 response to B cell receptor engagement (Lafarge et al., 2015). We therefore labelled  
422 these cell populations “active” and “inactive”. Interestingly, we find that forodesine and  
423 dG not only killed the “active” population of CLL B cells, but also induced markers of  
424 apoptosis in the “inactive” cells. As such, forodesine may have an advantage over  
425 other CLL drugs that inhibit B cell receptor signalling and thus target only “active” cells.  
426 In an independent line of investigations, SAMHD1 was found to not only degrade  
427 naturally occurring dNTPs but also some nucleotide analogues, including cytarabine  
428 (ara-C) and decitabine (DAC) that are used for treatment of acute myeloid leukaemia  
429 (AML) (Herold et al., 2017a; Herold et al., 2017b; Hollenbaugh et al., 2017; Oellerich  
430 et al., 2019; Schneider et al., 2017). The response of patients with AML to ara-C or  
431 DAC inversely correlates with SAMHD1 expression levels (Herold et al., 2017a;  
432 Oellerich et al., 2019; Schneider et al., 2017). These observations are an interesting  
433 parallel to our work and highlight SAMHD1 as a target for cancer therapy.  
434 In summary, we uncovered an important role of SAMHD1 in protecting cells against  
435 dNTP imbalance that otherwise triggers apoptotic cell death. These findings allowed  
436 us to selectively ablate *SAMHD1*-mutated transformed cells using a combination  
437 treatment involving forodesine and dG. In future, forodesine may be developed into  
438 a precision medicine for a subset of patients with leukaemia with acquired *SAMHD1*  
439 mutations.  
440

## 441 **Methods**

### 442 **Plasmids**

443 To generate pMSCVpuro-mSAMHD1, mouse *Samhd1* isoform 1 was PCR amplified.  
444 A kozak sequence and N-terminal 3xFLAG-tag were introduced by PCR and the PCR  
445 product was cloned into pMSCVpuro using the EcoRI site. To generate SAMHD1-  
446 deficient mouse cells, pX458-Ruby-sgRNA-1 and pX458-sgRNA-2 were cloned using  
447 pX458-Ruby and pX458, respectively, as described before (Hertzog et al., 2018).

448

### 449 **Mice**

450 *Samhd1*<sup>-/-</sup> mice (C57BL/6 background) were described previously (Rehwinkel et al.,  
451 2013). 8-12 week old, male and female C57BL/6 WT and *Samhd1*<sup>-/-</sup> mice were used  
452 to obtain bone marrow for BMDM cultures.

453

### 454 **Cell culture**

455 MEFs were made by standard protocols from either WT or *Samhd1*<sup>-/-</sup> mice. Bone  
456 marrow cells were isolated by standard protocols and, to obtain BMDMs, were grown  
457 in petri dishes for 7 days in R10 medium [Roswell Park Memorial Institute 1640 (RPMI)  
458 medium, 10% heat-inactivated foetal calf serum (FCS), 100 U/ml penicillin and 100  
459 µg/ml streptomycin (P/S), 2 mM L-Glutamine] supplemented with 20% L929  
460 conditioned medium and used on day 7. Human fibroblasts from AGS patients were  
461 provided by Y. Crow and G.I. Rice. MEFs were cultured in D10 medium [Dulbecco's  
462 modified Eagle medium (DMEM) containing 10% heat-inactivated FCS, P/S, 2mM L-  
463 Glutamine and 20 mM HEPES buffer]. Human fibroblasts, HeLa, B16F10 and MDA  
464 MB231 cells were cultured in D10 without P/S. HeLa cells were a gift from M. Way,  
465 MDA MB231 cells were from A. Banham and B16F10 cells were provided by V.  
466 Cerundolo. Jurkat cells were a gift from S. Davis and originate from the American Type  
467 Tissue Collection and were cultured in R10 without P/S. All cells were cultured under  
468 5% CO<sub>2</sub>. Human fibroblasts and MEFs were cultured under low oxygen (1.2% O<sub>2</sub>).

469

### 470 **Samples from patients with CLL**

471 PBMCs from 19 patients with CLL recruited into the ADMIRE (n=12) and ARCTIC  
472 (n=7) studies (Howard et al., 2017; Munir et al., 2017) were retrieved from the  
473 Liverpool Bio-Innovation Hub Biobank. Genetic characterisation of the tumour cells for

474 these patients was previously published (Clifford et al., 2014). PBMCs were thawed in  
475 R10 with P/S and 50 U/ml of benzonase, washed twice before being counted and  
476 plated. For CellTiter-Glo assay, 50,000 cells were plated in U-bottom 96-well plates.  
477 CyTOF experiments were performed using 3,000,000 cells in 12-well non-coated  
478 tissue culture plates.

479

#### 480 **dNTP measurements**

481 Cells from 4 plates (90 × 15 mm) of BMDMs or 3 plates (150 mm × 20 mm) of MEFs  
482 were pooled for each sample. Measurements were done on cells from different mice.  
483 Cells were treated with deoxynucleosides for a specific time and washed twice with  
484 ice-cold NaCl (9 g/L) on ice. Cells were then scraped in 550 µL of ice-cold  
485 trichloroacetic acid (15% w/v), MgCl<sub>2</sub> (30mM) solution, collected into an Eppendorf  
486 tube, frozen on dry ice and stored at -80 °C. Cells were thawed on ice and processed  
487 as described in (Kong et al., 2018). Briefly, the cell suspension was pulse-vortexed  
488 (Intellimixer) at 99 rpm for 10 min at 4°C and centrifuged at 20,000 × g for 1 min at  
489 4°C. The resulting supernatant was then neutralized twice with Freon-Trioctylamine  
490 mix (78% v/v - 22%, v/v respectively) by vortexing for 30 sec and centrifugation at  
491 20,000 × g for 1 min. 475 µL of the aqueous phase was pH-adjusted with 1 M  
492 ammonium carbonate (pH 8.9), loaded on boronate columns (Affi-Gel Boronate Gel;  
493 Bio-Rad), and eluted with a 50 mM ammonium carbonate (pH 8.9) and 15 mM  
494 MgCl<sub>2</sub> mixture to separate dNTPs from NTPs. The eluates containing dNTPs were  
495 adjusted to pH 4.5 and loaded onto an Oasis weak anion exchange (WAX) SPE  
496 cartridge. Interfering compounds were eluted off the cartridges in two steps with 1 mL  
497 ammonium acetate buffer (pH-adjusted to 4.5 with acetic acid) and 1 mL 0.5%  
498 ammonia aqueous solution in methanol (v/v), and the analytes were eluted from the  
499 cartridge with 2 mL methanol/water/ammonia solution (80/15/5, v/v/v) into a glass tube  
500 and then evaporated to dryness using a centrifugal evaporator at a temperature below  
501 37°C. The residue was reconstituted in 1250 µL ammonium bicarbonate buffer, pH-  
502 adjusted to 3.4 and used for the HPLC analysis as described in (Jia et al., 2015).  
503 Briefly, nucleotides were isocratically eluted using 0.36 M ammonium phosphate  
504 buffer (pH 3.4, 2.5 % v/v acetonitrile) as mobile phase. dNTPs were normalized to total  
505 NTP pool of the cells.

506

507 **Viability assays**

508 CellTiter-Glo (Promega), a luminescence assay that measures ATP levels, was used  
509 according to manufacturer instructions to assess viability. To assess cell viability with  
510 crystal violet, cells were stained with 0.5% crystal violet for 20 min, washed 3 times  
511 with water and dried overnight before being resuspend in 200  $\mu$ l methanol and  
512 absorbance was measured at 570 nm as described in (Feoktistova et al., 2016). For  
513 analysis of cell death with the Incucyte live-cell analysis system (Sartorius), Yoyo3  
514 iodide viability dye was used at 1/8000 final concentration and images were acquired.  
515 The Incucyte was also used to measure confluency and acquire bright-field images  
516 over time with a 10x objective.

517

518 **Apoptosis assays**

519 The Annexin V/7AAD kit was used to detect apoptotic cells by flow cytometry  
520 according to the manufacturer's protocol. Caspase 3/7 Glo (Promega) was used to  
521 measure caspase 3/7 cleavage. For live cell imaging, BMDMs were cultured in a glass  
522 chamber coated with Poly-L-lysine at 37°C and 5% CO<sub>2</sub>. Culture media were  
523 supplemented with 2.5mM CaCl<sub>2</sub>, 20 mM HEPES, propidium iodide (3  $\mu$ l/well) and  
524 Annexin V AF488 (1  $\mu$ l/well). Images were acquired with a Delta Vision microscope  
525 with 10x objective lens every 10 minutes for 24 hours.

526

527 **Cell cycle analysis**

528 BMDMs were seeded at 10<sup>6</sup> cells/well in 6-well low attachment plates and were  
529 incubated with 10  $\mu$ M BrdU for 30 min. In pulse chase experiments, cells were  
530 incubated with 10  $\mu$ M BrdU for 15 min, the media was then replaced, and cells were  
531 exposed to dG. At appropriate time points, cells were washed and fixed in 70% ethanol  
532 and frozen at -20°C. Cells were washed and resuspend in pepsin solution (1 mg/ml in  
533 30 mM HCl) for 30 min at 37°C, spun down and resuspend in 2M HCl for 15 min at  
534 room temperature (RT) and washed with PBS. Cells were then blocked with 0.5%  
535 BSA, 0.5% Tween-20 in PBS for 30 min at room temperature, washed and resuspend  
536 in FACS buffer with  $\alpha$ -BrdU AF488 antibody at 1:100 dilution for 30 min at room  
537 temperature. Fix Cycle PI/RNase A staining solution was added to the cells for 30 min  
538 at RT. Cells were acquired on a BD LSR II flow cytometer.

539



540 **Clonogenic assay**

541 Jurkat cells were treated with dG for 20 hours in IMDM with 10% FCS. 1200 cells were  
542 then seeded per well in 6 well plates in methylcellulose, semi-solid medium (40%  
543 MethoCult, 39% IMDM, 20% FCS, 1% glutamax and primocin at 100 µg/ml) containing  
544 dG. After 13 days incubation, cell colonies were counted manually.

545

546 **Measurement of ROS production**

547 H<sub>2</sub>O<sub>2</sub> production was measured using the ROS-Glo H<sub>2</sub>O<sub>2</sub> assay (Promega) according  
548 the manufacturer's instructions.

549

550 **Western blots**

551 Cells were lysed in NP-40 buffer (150 mM NaCl, 1% NP-40, 50 mM Tris pH 8.0) with  
552 protease and phosphatase inhibitors. After 20 min incubation on ice, lysates were  
553 centrifuged at 17,000g for 10 min at 4°C. Supernatant was collected and diluted with  
554 sample buffer before denaturation at 94°C for 5 min. Samples were loaded on pre-  
555 cast 4-12 % gradient Bis-Tris protein gels that were run with MOPS or MES buffer at  
556 120 volts for 2 hours. Transfer to nitrocellulose membranes was performed in transfer  
557 buffer (25mM Tris, 192mM glycine, 20% methanol) at 30 volts for 3.5 hours.  
558 Membranes were blocked in 5% milk powder in Tris buffered saline with 1 % Tween-  
559 20 (TBST) for 1 hour at room temperature then washed 5 times for 5 min in TBST.  
560 Membranes were incubated with primary antibody in 5 % milk TBST overnight at 4°C,  
561 then washed 5 times for 5 min in TBST. ECL or ECL prime substrates were used for  
562 signal detection. In some experiments, membranes were stripped (0.2 M glycine, 0.1  
563 % SDS at pH 2.5) for 15 minutes, washed, blocked and re-probed with a different  
564 antibody.

565

566 **Retroviral vectors**

567 VSV-G-pseudotyped retroviral vectors were produced by plasmid transfection of 293T  
568 cells (Bridgeman et al., 2015). Retroviral infections were performed in the presence of  
569 8 µg/ml polybrene. Bone marrow cells were transduced three times by spin-infection  
570 (2500 rpm, 120 min, 32°C, no brakes) on days 1, 2 and 3 of the 7-day differentiation  
571 process with the retroviral vector expressing SAMHD1 or a control vector. Cells were  
572 seeded into new plates on day 7 and treated with dG on the next day. THP1 cells were

573 transduced by spin infection (2500 rpm, 120 min, 32°C, no brakes), seeded and  
574 treated as indicated in the figure legends. Jurkat cells, MDA-MB231 and Hela cells  
575 were transduced by adding viral vectors to the culture medium. VLP<sub>vpx</sub> and VLP<sub>ctrl</sub>  
576 were generated using the SIVmac gag-pol expression vectors SIV3+ and SIV4+  
577 (Maelfait et al., 2016). Human SAMHD1 expression constructs pCSHAwtW and  
578 pCSHAk11aW were a kind gift from T. Schaller. These were used to generate  
579 lentiviruses for reconstitution of Jurkat cells (Bridgeman et al., 2015). Mouse SAMHD1  
580 expression construct pMSCVpuro-mSAMHD1 was used to generate a retroviral vector  
581 to transduce bone marrow cells as described earlier (Rehwinkel et al., 2013).

582

### 583 **Stimulation, staining and mass cytometry analysis of patient samples**

584 PBMCs were collected 24 hours after treatment with forodesine and dG, and were  
585 processed according to the Fluidigm Maxpar protocol, using Maxpar reagents.  
586 Antibodies are listed in the Supplementary table 2. Cells were collected in 15 ml falcon  
587 tubes and were washed in PBS, using centrifugation at 300 g for 5 min. Cells were  
588 resuspend at 10<sup>7</sup>/ml in R0 with Cisplatin (1:10,000) and incubated at 37°C for 5  
589 minutes. Cells were washed with R10 and resuspend in Maxpar PBS. Staining was  
590 performed on 3\*10<sup>6</sup> cells/tube. Staining with CD56, CD27, CCR4 and CCR7 was done  
591 before fixation. Cells were fixed with Maxpar Fix I Buffer at room temperature (RT) for  
592 10 min then washed with Maxpar Cell Staining Buffer (CSB) and spun at 800 g for 5  
593 min. Cells were barcoded (fluidigm barcoding kit) for 30 min at RT, washed twice in  
594 CSB, pooled and counted. All further steps were performed on the pooled sample.  
595 Cells were blocked in FcR block diluted in CSB (1:10) for 10 min at RT. Surface  
596 staining antibody mix was added to blocking solution and incubated for 30 min at RT.  
597 Cells were washed in CSB, resuspend in ice cold methanol added dropwise under the  
598 vortex and stored at -80°C overnight. Cells were washed twice with CSB and stained  
599 with the intracellular antibody mix for 30 min at RT and stained with intercalator  
600 overnight. Next day they were washed with CSB and resuspend in water before  
601 acquisition on the Helios mass cytometer (Fluidigm). Samples were normalized,  
602 concatenated and de-barcoded using Helios software. Files were analysed with  
603 Cytobank.

604

### 605 **Generation of *Samhd1*<sup>-/-</sup> B16F10 cells**



606 sgRNAs were designed to excise exon 2 of mouse *Samhd1* (Gene ID: 56045). Exon  
607 2 is critical to both isoforms of *Samhd1* (see Supplementary figure 2b and (Rehwinkel  
608 et al., 2013)). B16F10 cells were co-transfected with pX458-Ruby-sgRNA-1 and  
609 pX458-sgRNA-2 plasmids. GFP-Ruby double positive cells were single cell sorted and  
610 clones were expanded. A PCR screening approach was used to identify knock-out  
611 cells. PCR-1 was designed to amplify a long fragment (709 bp) from the WT allele and  
612 a short fragment (350 bp) from the KO allele using primer 1 fwd and primer 2 rvs (see  
613 Supplementary figure 2b). PCR-2 had a primer located in exon 2 and amplified a  
614 fragment (352 bp) only from the WT allele using primer 2 rvs and primer 3 fwd  
615 (Supplementary table 1).

616

### 617 **Statistics**

618 All experiments were performed three times or more independently under similar  
619 conditions, unless specified otherwise in figure legends. Statistical significance was  
620 calculated by unpaired t-test, one-way ANOVA or two-way ANOVA as described in  
621 the figure legends;  $p < 0.05$  was considered significant. Graph pad prism 7 software  
622 was used to generate graphs and to perform statistical analysis.

623

### 624 **Study approval**

625 Mouse work was performed in accordance with the UK Animals (Scientific  
626 Procedures) Act 1986 and institutional guidelines for animal care. This work was  
627 approved by a project license granted by the UK Home Office (PPL No. PC041D0AB)  
628 and also was approved by the Institutional Animal Ethics Committee Review Board at  
629 the University of Oxford.

630 Informed consent from all patients was obtained in line with the Declaration of Helsinki.  
631 The CLL work was covered by the Ethics approval REC 09/H1306/54. Human  
632 fibroblasts from patients with AGS were collected with approval by a U.K. Multicentre  
633 Research Ethics Committee (reference number 04:MRE00/19).

634

635

636 **Author contributions** (using the CRediT taxonomy)

637 Conceptualization: T.D., R.E.R., A.S. and J.R.; Methodology: T.D., R.E.R., C.C. and  
638 A.B.; Software: n.a.; Validation: T.D. and J.R.; Formal analysis: T.D. and J.R.;  
639 Investigation: T.D., B.D., R.E.R. and S.S.; Resources: J.K., P.H. and A.S.; Data  
640 curation: T.D.; Writing – Original Draft: T.D. and J.R.; Writing – Review & Editing: all  
641 authors; Visualization: T.D. and J.R.; Supervision: J.R., A.C. and K.D.K; Project  
642 administration: J.R.; Funding acquisition: T.D. and J.R.

643

644 **Acknowledgments**

645 The authors thank Y. Crow and G.I. Rice for providing primary human fibroblasts, T.  
646 Yokomatsu for homo-DFPP-DG or 6C-DFPP-DG, and T. Schaller for SAMHD1  
647 expression vectors. We thank Quentin Sattentau, members of the Rehwinkel lab,  
648 Jonathan Maelfait, Persephone Borrow, Jane McKeating, Philippe Pasero, Yea-Lih  
649 Lin, Skirmantas Kriaucionis, Wojciech Niedzwiedz and Vincenzo Cerundolo for  
650 discussion. We would like to acknowledge Giorgio Napolitani and Michalina  
651 Mazurczyk for their help in the mass cytometry facility at the WIMM for providing  
652 technical expertise, cell analysis services and scientific input. The facility is supported  
653 by the MRC HIU core funded project, reference MC\_UU\_00008, and the Oxford Single  
654 Cell Biology Consortium (OSCBC). We thank Philip Hublitz for his help with generation  
655 of *Samhd1*<sup>-/-</sup> B16F10 cells. The WIMM Genome Engineering Facility is supported by  
656 grants from the MRC/MHU (MC\_UU\_\_12009), the John Fell Fund (123/737) and by  
657 WIMM Strategic Alliance awards G0902418 and MC\_UU\_12025. The authors would  
658 like to acknowledge Dr Melani Oates, Liverpool Bio-Innovation Hub Biobank, for help  
659 with CLL sample retrieval. This work was funded by the UK Medical Research Council  
660 [MRC core funding of the MRC Human Immunology Unit; J.R.]; the Wellcome Trust  
661 [grant number 100954; J.R.], the Swedish Cancer Society and the Swedish Research  
662 Council [A.C.] and a C1 KU Leuven Research Council grant [number C14/18/104;  
663 KDK]. T.D. was supported by the Wellcome Trust Infection, Immunology &  
664 Translational Medicine doctoral programme [grant number 105400/Z/14/Z]. AS is  
665 partly funded by the National Institute for Health Research Oxford Biomedical  
666 Research Centre. The views and opinions expressed are those of the authors and do  
667 not necessarily reflect those of the National Institute for Health Research, the UK  
668 National Health Service, the UK Department of Health or the Universities of Oxford

669 and Cambridge. The funders had no role in study design, data collection and analysis,  
670 decision to publish, or preparation of the manuscript.

671

672 **Declaration of interests**

673 The authors have declared that no conflict of interest exists.

674

675 **Data availability statement**

676 The authors declare that all data supporting the findings of this study are available  
677 within the paper and its supplementary information files.

678 **References**

679

680 Ahn, J. (2016). Functional organization of human SAMHD1 and mechanisms of HIV-  
681 1 restriction. *Biol Chem* 397, 373-379.

682 Alonso, R., Lopez-Guerra, M., Upshaw, R., Bantia, S., Smal, C., Bontemps, F.,  
683 Manz, C., Mehrling, T., Villamor, N., Campo, E., *et al.* (2009). Forodesine has high  
684 antitumor activity in chronic lymphocytic leukemia and activates p53-independent  
685 mitochondrial apoptosis by induction of p73 and BIM. *Blood* 114, 1563-1575.

686 Amir el, A.D., Davis, K.L., Tadmor, M.D., Simonds, E.F., Levine, J.H., Bendall, S.C.,  
687 Shenfeld, D.K., Krishnaswamy, S., Nolan, G.P., and Pe'er, D. (2013). viSNE enables  
688 visualization of high dimensional single-cell data and reveals phenotypic  
689 heterogeneity of leukemia. *Nat Biotechnol* 31, 545-552.

690 Arpaia, E., Benveniste, P., Di Cristofano, A., Gu, Y., Dalal, I., Kelly, S., Hershfield,  
691 M., Pandolfi, P.P., Roifman, C.M., and Cohen, A. (2000). Mitochondrial basis for  
692 immune deficiency. Evidence from purine nucleoside phosphorylase-deficient mice.  
693 *The Journal of experimental medicine* 191, 2197-2208.

694 Balakrishnan, K., Nimmanapalli, R., Ravandi, F., Keating, M.J., and Gandhi, V.  
695 (2006). Forodesine, an inhibitor of purine nucleoside phosphorylase, induces  
696 apoptosis in chronic lymphocytic leukemia cells. *Blood* 108, 2392-2398.

697 Balakrishnan, K., Ravandi, F., Bantia, S., Franklin, A., and Gandhi, V. (2013).  
698 Preclinical and clinical evaluation of forodesine in pediatric and adult B-cell acute  
699 lymphoblastic leukemia. *Clin Lymphoma Myeloma Leuk* 13, 458-466.

700 Balakrishnan, K., Verma, D., O'Brien, S., Kilpatrick, J.M., Chen, Y., Tyler, B.F.,  
701 Bickel, S., Bantia, S., Keating, M.J., Kantarjian, H., *et al.* (2010). Phase 2 and  
702 pharmacodynamic study of oral forodesine in patients with advanced, fludarabine-  
703 treated chronic lymphocytic leukemia. *Blood* 116, 886-892.

704 Baldauf, H.-M., Pan, X., Erikson, E., Schmidt, S., Daddacha, W., Burggraf, M.,  
705 Schenkova, K., Ambiel, I., Wabnitz, G., Gramberg, T., *et al.* (2012). SAMHD1  
706 restricts HIV-1 infection in resting CD4(+) T cells. In *Nature medicine* (Nature  
707 Publishing Group), pp. 1682-1687.

708 Ballana, E., and Este, J.A. (2015). SAMHD1: at the crossroads of cell proliferation,  
709 immune responses, and virus restriction. *Trends in microbiology* 23, 680-692.

710 Bantia, S., Ananth, S.L., Parker, C.D., Horn, L.L., and Upshaw, R. (2003).  
711 Mechanism of inhibition of T-acute lymphoblastic leukemia cells by PNP inhibitor--  
712 BCX-1777. *International immunopharmacology* 3, 879-887.

- 713 Bantia, S., Miller, P.J., Parker, C.D., Ananth, S.L., Horn, L.L., Kilpatrick, J.M., Morris,  
714 P.E., Hutchison, T.L., Montgomery, J.A., and Sandhu, J.S. (2001). Purine nucleoside  
715 phosphorylase inhibitor BCX-1777 (Imrucillan-H)--a novel potent and orally active  
716 immunosuppressive agent. *International immunopharmacology* 1, 1199-1210.
- 717 Bantia, S., Parker, C., Upshaw, R., Cunningham, A., Kotian, P., Kilpatrick, J.M.,  
718 Morris, P., Chand, P., and Babu, Y.S. (2010). Potent orally bioavailable purine  
719 nucleoside phosphorylase inhibitor BCX-4208 induces apoptosis in B- and T-  
720 lymphocytes--a novel treatment approach for autoimmune diseases, organ  
721 transplantation and hematologic malignancies. *International immunopharmacology*  
722 10, 784-790.
- 723 Behrendt, R., Schumann, T., Gerbaulet, A., Nguyen, L.A., Schubert, N.,  
724 Alexopoulou, D., Berka, U., Lienenklaus, S., Peschke, K., Gibbert, K., *et al.* (2013).  
725 Mouse SAMHD1 has antiretroviral activity and suppresses a spontaneous cell-  
726 intrinsic antiviral response. *Cell reports* 4, 689-696.
- 727 Bridgeman, A., Maelfait, J., Davenne, T., Partridge, T., Peng, Y., Mayer, A., Dong,  
728 T., Kaefer, V., Borrow, P., and Rehwinkel, J. (2015). Viruses transfer the antiviral  
729 second messenger cGAMP between cells. *Science* 349, 1228-1232.
- 730 Clifford, R., Louis, T., Robbe, P., Ackroyd, S., Burns, A., Timbs, A.T., Wright Colopy,  
731 G., Dreau, H., Sigaux, F., Judde, J.G., *et al.* (2014). SAMHD1 is mutated recurrently  
732 in chronic lymphocytic leukemia and is involved in response to DNA damage. *Blood*  
733 123, 1021-1031.
- 734 Coquel, F., Silva, M.J., Techer, H., Zadorozhny, K., Sharma, S., Nieminuszczy, J.,  
735 Mettling, C., Dardillac, E., Barthe, A., Schmitz, A.L., *et al.* (2018). SAMHD1 acts at  
736 stalled replication forks to prevent interferon induction. *Nature* 557, 57-61.
- 737 Crow, Y.J., and Manel, N. (2015). Aicardi-Goutieres syndrome and the type I  
738 interferonopathies. *Nature reviews Immunology* 15, 429-440.
- 739 Daddacha, W., Koyen, A.E., Bastien, A.J., Head, P.E., Dhere, V.R., Nabeta, G.N.,  
740 Connolly, E.C., Werner, E., Madden, M.Z., Daly, M.B., *et al.* (2017). SAMHD1  
741 Promotes DNA End Resection to Facilitate DNA Repair by Homologous  
742 Recombination. *Cell reports* 20, 1921-1935.
- 743 Dahbo, Y., and Eriksson, S. (1985). On the mechanism of deoxyribonucleoside  
744 toxicity in human T-lymphoblastoid cells. Reversal of growth inhibition by addition of  
745 cytidine. *Eur J Biochem* 150, 429-434.
- 746 Dummer, R., Duvic, M., Scarisbrick, J., Olsen, E.A., Rozati, S., Eggmann, N.,  
747 Goldinger, S.M., Hutchinson, K., Geskin, L., Illidge, T.M., *et al.* (2014). Final results  
748 of a multicenter phase II study of the purine nucleoside phosphorylase (PNP)  
749 inhibitor forodesine in patients with advanced cutaneous T-cell lymphomas (CTCL)  
750 (Mycosis fungoides and Sezary syndrome). *Ann Oncol* 25, 1807-1812.

- 751 Eriksson, S., Munch-Petersen, B., Johansson, K., and Eklund, H. (2002). Structure  
752 and function of cellular deoxyribonucleoside kinases. *Cell Mol Life Sci* 59, 1327-  
753 1346.
- 754 Feoktistova, M., Geserick, P., and Leverkus, M. (2016). Crystal Violet Assay for  
755 Determining Viability of Cultured Cells. *Cold Spring Harb Protoc* 2016, pdb  
756 prot087379.
- 757 Frank, D.A., Mahajan, S., and Ritz, J. (1997). B lymphocytes from patients with  
758 chronic lymphocytic leukemia contain signal transducer and activator of transcription  
759 (STAT) 1 and STAT3 constitutively phosphorylated on serine residues. *The Journal*  
760 *of clinical investigation* 100, 3140-3148.
- 761 Franzolin, E., Salata, C., Bianchi, V., and Rampazzo, C. (2015). The  
762 Deoxynucleoside Triphosphate Triphosphohydrolase Activity of SAMHD1 Protein  
763 Contributes to the Mitochondrial DNA Depletion Associated with Genetic Deficiency  
764 of Deoxyguanosine Kinase. *J Biol Chem* 290, 25986-25996.
- 765 Gabrio, B.W., Huennekens, F.M., and Nurk, E. (1956). Erythrocyte metabolism. I.  
766 Purine nucleoside phosphorylase. *J Biol Chem* 221, 971-981.
- 767 Gandhi, V., and Balakrishnan, K. (2007). Pharmacology and mechanism of action of  
768 forodesine, a T-cell targeted agent. *Semin Oncol* 34, S8-12.
- 769 Gandhi, V., Kilpatrick, J.M., Plunkett, W., Ayres, M., Harman, L., Du, M., Bantia, S.,  
770 Davisson, J., Wierda, W.G., Faderl, S., *et al.* (2005). A proof-of-principle  
771 pharmacokinetic, pharmacodynamic, and clinical study with purine nucleoside  
772 phosphorylase inhibitor immucillin-H (BCX-1777, forodesine). *Blood* 106, 4253-4260.
- 773 Glavas-Obrovac, L., Suver, M., Hikishima, S., Hashimoto, M., Yokomatsu, T.,  
774 Magnowska, L., and Bzowska, A. (2010). Antiproliferative activity of purine  
775 nucleoside phosphorylase multisubstrate analogue inhibitors containing  
776 difluoromethylene phosphonic acid against leukaemia and lymphoma cells. *Chem*  
777 *Biol Drug Des* 75, 392-399.
- 778 Goldstone, D.C., Ennis-Adeniran, V., Hedden, J.J., Groom, H.C., Rice, G.I.,  
779 Christodoulou, E., Walker, P.A., Kelly, G., Haire, L.F., Yap, M.W., *et al.* (2011). HIV-1  
780 restriction factor SAMHD1 is a deoxynucleoside triphosphate triphosphohydrolase.  
781 *Nature* 480, 379-382.
- 782 Herishanu, Y., Perez-Galan, P., Liu, D., Biancotto, A., Pittaluga, S., Vire, B., Gibellini,  
783 F., Njuguna, N., Lee, E., Stennett, L., *et al.* (2011). The lymph node  
784 microenvironment promotes B-cell receptor signaling, NF-kappaB activation, and  
785 tumor proliferation in chronic lymphocytic leukemia. *Blood* 117, 563-574.
- 786 Herold, N., Rudd, S.G., Ljungblad, L., Sanjiv, K., Myrberg, I.H., Paulin, C.B.,  
787 Heshmati, Y., Hagenkort, A., Kutzner, J., Page, B.D., *et al.* (2017a). Targeting

- 788 SAMHD1 with the Vpx protein to improve cytarabine therapy for hematological  
789 malignancies. *Nature medicine* 23, 256-263.
- 790 Herold, N., Rudd, S.G., Sanjiv, K., Kutzner, J., Bladh, J., Paulin, C.B.J., Helleday, T.,  
791 Henter, J.I., and Schaller, T. (2017b). SAMHD1 protects cancer cells from various  
792 nucleoside-based antimetabolites. *Cell Cycle* 16, 1029-1038.
- 793 Hertzog, J., Dias Junior, A.G., Rigby, R.E., Donald, C.L., Mayer, A., Sezgin, E.,  
794 Song, C., Jin, B., Hublitz, P., Eggeling, C., *et al.* (2018). Infection with a Brazilian  
795 isolate of Zika virus generates RIG-I stimulatory RNA and the viral NS5 protein  
796 blocks type I IFN induction and signaling. *Eur J Immunol*.
- 797 Hikishima, S., Hashimoto, M., Magnowska, L., Bzowska, A., and Yokomatsu, T.  
798 (2007). Synthesis and biological evaluation of 9-deazaguanine derivatives connected  
799 by a linker to difluoromethylene phosphonic acid as multi-substrate analogue  
800 inhibitors of PNP. *Bioorg Med Chem Lett* 17, 4173-4177.
- 801 Hikishima, S., Hashimoto, M., Magnowska, L., Bzowska, A., and Yokomatsu, T.  
802 (2010). Structural-based design and synthesis of novel 9-deazaguanine derivatives  
803 having a phosphate mimic as multi-substrate analogue inhibitors for mammalian  
804 PNPs. *Bioorg Med Chem* 18, 2275-2284.
- 805 Hofer, A., Crona, M., Logan, D.T., and Sjöberg, B.M. (2012). DNA building blocks:  
806 keeping control of manufacture. *Crit Rev Biochem Mol Biol* 47, 50-63.
- 807 Hollenbaugh, J.A., Shelton, J., Tao, S., Amiralaie, S., Liu, P., Lu, X., Goetze, R.W.,  
808 Zhou, L., Nettles, J.H., Schinazi, R.F., *et al.* (2017). Substrates and Inhibitors of  
809 SAMHD1. *PLoS one* 12, e0169052.
- 810 Howard, D.R., Munir, T., McParland, L., Rawstron, A.C., Milligan, D., Schuh, A.,  
811 Hockaday, A., Allsup, D.J., Marshall, S., Duncombe, A.S., *et al.* (2017). Results of  
812 the randomized phase IIB ARCTIC trial of low-dose rituximab in previously untreated  
813 CLL. *Leukemia* 31, 2416-2425.
- 814 Hrecka, K., Hao, C., Gierszewska, M., Swanson, S.K., Kesik-Brodacka, M.,  
815 Srivastava, S., Florens, L., Washburn, M.P., and Skowronski, J. (2011). Vpx relieves  
816 inhibition of HIV-1 infection of macrophages mediated by the SAMHD1 protein.  
817 *Nature* 474, 658-661.
- 818 Inoue, K. (2017). Molecular Basis of Nucleobase Transport Systems in Mammals.  
819 *Biol Pharm Bull* 40, 1130-1138.
- 820 Jia, S., Marjavaara, L., Buckland, R., Sharma, S., and Chabes, A. (2015).  
821 Determination of deoxyribonucleoside triphosphate concentrations in yeast cells by  
822 strong anion-exchange high-performance liquid chromatography coupled with  
823 ultraviolet detection. *Methods Mol Biol* 1300, 113-121.



- 824 Johansson, P., Klein-Hitpass, L., Choidas, A., Habenberger, P., Mahboubi, B., Kim,  
825 B., Bergmann, A., Scholtysik, R., Brauser, M., Lollies, A., *et al.* (2018). SAMHD1 is  
826 recurrently mutated in T-cell prolymphocytic leukemia. *Blood Cancer J* 8, 11.
- 827 Kicska, G.A., Long, L., Horig, H., Fairchild, C., Tyler, P.C., Furneaux, R.H.,  
828 Schramm, V.L., and Kaufman, H.L. (2001). Immucillin H, a powerful transition-state  
829 analog inhibitor of purine nucleoside phosphorylase, selectively inhibits human T  
830 lymphocytes. *Proceedings of the National Academy of Sciences of the United States*  
831 *of America* 98, 4593-4598.
- 832 Kimball, A.K., Oko, L.M., Bullock, B.L., Nemenoff, R.A., van Dyk, L.F., and Clambey,  
833 E.T. (2018). A Beginner's Guide to Analyzing and Visualizing Mass Cytometry Data.  
834 *J Immunol* 200, 3-22.
- 835 Kong, Z., Jia, S., Chabes, A.L., Appelblad, P., Lundmark, R., Moritz, T., and Chabes,  
836 A. (2018). Simultaneous determination of ribonucleoside and deoxyribonucleoside  
837 triphosphates in biological samples by hydrophilic interaction liquid chromatography  
838 coupled with tandem mass spectrometry. *Nucleic acids research* 46, e66.
- 839 Kumar, D., Abdulovic, A.L., Viberg, J., Nilsson, A.K., Kunkel, T.A., and Chabes, A.  
840 (2011). Mechanisms of mutagenesis in vivo due to imbalanced dNTP pools. *Nucleic*  
841 *acids research* 39, 1360-1371.
- 842 Lafarge, S.T., Hou, S., Pauls, S.D., Johnston, J.B., Gibson, S.B., and Marshall, A.J.  
843 (2015). Differential expression and function of CD27 in chronic lymphocytic leukemia  
844 cells expressing ZAP-70. *Leuk Res* 39, 773-778.
- 845 Laguette, N., Sobhian, B., Casartelli, N., Ringeard, M., Chable-Bessia, C., Segeral,  
846 E., Yatim, A., Emiliani, S., Schwartz, O., and Benkirane, M. (2011). SAMHD1 is the  
847 dendritic- and myeloid-cell-specific HIV-1 restriction factor counteracted by Vpx.  
848 *Nature* 474, 654-657.
- 849 Lahouassa, H., Daddacha, W., Hofmann, H., Ayinde, D., Logue, E.C., Dragin, L.,  
850 Bloch, N., Maudet, C., Bertrand, M., Gramberg, T., *et al.* (2012). SAMHD1 restricts  
851 the replication of human immunodeficiency virus type 1 by depleting the intracellular  
852 pool of deoxynucleoside triphosphates. *Nature immunology* 13, 223-228.
- 853 Lentz, S.I., Edwards, J.L., Backus, C., McLean, L.L., Haines, K.M., and Feldman,  
854 E.L. (2010). Mitochondrial DNA (mtDNA) biogenesis: visualization and dual  
855 incorporation of BrdU and EdU into newly synthesized mtDNA in vitro. *J Histochem*  
856 *Cytochem* 58, 207-218.
- 857 Li, N., Zhang, W., and Cao, X. (2000). Identification of human homologue of mouse  
858 IFN-gamma induced protein from human dendritic cells. *Immunology letters* 74, 221-  
859 224.



- 860 Li, P., Nijhawan, D., Budihardjo, I., Srinivasula, S.M., Ahmad, M., Alnemri, E.S., and  
861 Wang, X. (1997). Cytochrome c and dATP-dependent formation of Apaf-1/caspase-9  
862 complex initiates an apoptotic protease cascade. *Cell* 91, 479-489.
- 863 Maelfait, J., Bridgeman, A., Benlahrech, A., Cursi, C., and Rehwinkel, J. (2016).  
864 Restriction by SAMHD1 Limits cGAS/STING-Dependent Innate and Adaptive  
865 Immune Responses to HIV-1. *Cell reports* 16, 1492-1501.
- 866 Mann, G.J., and Fox, R.M. (1986). Deoxyadenosine triphosphate as a mediator of  
867 deoxyguanosine toxicity in cultured T lymphoblasts. *The Journal of clinical*  
868 *investigation* 78, 1261-1269.
- 869 Markert, M.L. (1991). Purine nucleoside phosphorylase deficiency. *Immunodeficiency Rev*  
870 3, 45-81.
- 871 Maruyama, D., Tsukasaki, K., Uchida, T., Maeda, Y., Shibayama, H., Nagai, H.,  
872 Kurosawa, M., Suehiro, Y., Hatake, K., Ando, K., *et al.* (2018). Multicenter phase 1/2  
873 study of forodesine in patients with relapsed peripheral T cell lymphoma. *Ann*  
874 *Hematol.*
- 875 Moore, E.C., and Hurlbert, R.B. (1966). Regulation of mammalian  
876 deoxyribonucleotide biosynthesis by nucleotides as activators and inhibitors. *J Biol*  
877 *Chem* 241, 4802-4809.
- 878 Munir, T., Howard, D.R., McParland, L., Pocock, C., Rawstron, A.C., Hockaday, A.,  
879 Varghese, A., Hamblin, M., Bloor, A., Pettitt, A., *et al.* (2017). Results of the  
880 randomized phase IIB ADMIRE trial of FCR with or without mitoxantrone in  
881 previously untreated CLL. *Leukemia* 31, 2085-2093.
- 882 Negre, D., Mangeot, P.E., Duisit, G., Blanchard, S., Vidalain, P.O., Leissner, P.,  
883 Winter, A.J., Rabourdin-Combe, C., Mehtali, M., Moullier, P., *et al.* (2000).  
884 Characterization of novel safe lentiviral vectors derived from simian  
885 immunodeficiency virus (SIVmac251) that efficiently transduce mature human  
886 dendritic cells. *Gene Ther* 7, 1613-1623.
- 887 Oellerich, T., Schneider, C., Thomas, D., Knecht, K.M., Buzovetsky, O., Kaderali, L.,  
888 Schliemann, C., Bohnenberger, H., Angenendt, L., Hartmann, W., *et al.* (2019).  
889 Selective inactivation of hypomethylating agents by SAMHD1 provides a rationale for  
890 therapeutic stratification in AML. *Nature communications* 10, 3475.
- 891 Ogura, M., Tsukasaki, K., Nagai, H., Uchida, T., Oyama, T., Suzuki, T., Taguchi, J.,  
892 Maruyama, D., Hotta, T., and Tobinai, K. (2012). Phase I study of BCX1777  
893 (forodesine) in patients with relapsed or refractory peripheral T/natural killer-cell  
894 malignancies. *Cancer Sci* 103, 1290-1295.

- 895 Poli, J., Tsaponina, O., Crabbe, L., Keszthelyi, A., Pantesco, V., Chabes, A.,  
896 Lengronne, A., and Pasero, P. (2012). dNTP pools determine fork progression and  
897 origin usage under replication stress. *The EMBO journal* 31, 883-894.
- 898 Posmantur, R., Wang, K.K., Nath, R., and Gilbertsen, R.B. (1997). A purine  
899 nucleoside phosphorylase (PNP) inhibitor induces apoptosis via caspase-3-like  
900 protease activity in MOLT-4 T cells. *Immunopharmacology* 37, 231-244.
- 901 Powell, R.D., Holland, P.J., Hollis, T., and Perrino, F.W. (2011). Aicardi-Goutieres  
902 syndrome gene and HIV-1 restriction factor SAMHD1 is a dGTP-regulated  
903 deoxynucleotide triphosphohydrolase. *J Biol Chem* 286, 43596-43600.
- 904 Rehwinkel, J., Maelfait, J., Bridgeman, A., Rigby, R., Hayward, B., Liberatore, R.A.,  
905 Bieniasz, P.D., Towers, G.J., Moita, L.F., Crow, Y.J., *et al.* (2013). SAMHD1-  
906 dependent retroviral control and escape in mice. *The EMBO journal* 32, 2454-2462.
- 907 Reichard, P. (1988). Interactions between deoxyribonucleotide and DNA synthesis.  
908 *Annual review of biochemistry* 57.
- 909 Rentoft, M., Lindell, K., Tran, P., Chabes, A.L., Buckland, R.J., Watt, D.L.,  
910 Marjavaara, L., Nilsson, A.K., Melin, B., Trygg, J., *et al.* (2016). Heterozygous colon  
911 cancer-associated mutations of SAMHD1 have functional significance. *Proceedings*  
912 *of the National Academy of Sciences of the United States of America* 113, 4723-  
913 4728.
- 914 Reubold, T.F., Wohlgemuth, S., and Eschenburg, S. (2009). A new model for the  
915 transition of APAF-1 from inactive monomer to caspase-activating apoptosome. *J*  
916 *Biol Chem* 284, 32717-32724.
- 917 Rice, G.I., Bond, J., Asipu, A., Brunette, R.L., Manfield, I.W., Carr, I.M., Fuller, J.C.,  
918 Jackson, R.M., Lamb, T., Briggs, T.A., *et al.* (2009). Mutations involved in Aicardi-  
919 Goutieres syndrome implicate SAMHD1 as regulator of the innate immune response.  
920 *Nature genetics* 41, 829-832.
- 921 Ringshausen, I., Dechow, T., Schneller, F., Weick, K., Oelsner, M., Peschel, C., and  
922 Decker, T. (2004). Constitutive activation of the MAPkinase p38 is critical for MMP-9  
923 production and survival of B-CLL cells on bone marrow stromal cells. *Leukemia* 18,  
924 1964-1970.
- 925 Schaller, T., Pollpeter, D., Apolonia, L., Goujon, C., and Malim, M.H. (2014). Nuclear  
926 import of SAMHD1 is mediated by a classical karyopherin alpha/beta1 dependent  
927 pathway and confers sensitivity to VpxMAC induced ubiquitination and proteasomal  
928 degradation. *Retrovirology* 11, 29.
- 929 Schmidt, S., Schenkova, K., Adam, T., Erikson, E., Lehmann-Koch, J., Sertel, S.,  
930 Verhasselt, B., Fackler, O.T., Lasitschka, F., and Keppler, O.T. (2015). SAMHD1's  
931 protein expression profile in humans. *J Leukoc Biol* 98, 5-14.

- 932 Schneider, C., Oellerich, T., Baldauf, H.M., Schwarz, S.M., Thomas, D., Flick, R.,  
933 Bohnenberger, H., Kaderali, L., Stegmann, L., Cremer, A., *et al.* (2017). SAMHD1 is  
934 a biomarker for cytarabine response and a therapeutic target in acute myeloid  
935 leukemia. *Nature medicine* 23, 250-255.
- 936 Schuh, A., Becq, J., Humphray, S., Alexa, A., Burns, A., Clifford, R., Feller, S.M.,  
937 Grocock, R., Henderson, S., Khrebtukova, I., *et al.* (2012). Monitoring chronic  
938 lymphocytic leukemia progression by whole genome sequencing reveals  
939 heterogeneous clonal evolution patterns. *Blood* 120, 4191-4196.
- 940 Shukla, A., Shukla, V., and Joshi, S.S. (2018). Regulation of MAPK signaling and  
941 implications in chronic lymphocytic leukemia. *Leuk Lymphoma* 59, 1565-1573.
- 942 Swerdlow, S.H. (2008). WHO classification of tumours of haematopoietic and  
943 lymphoid tissues (Lyon: International Agency for Research on Cancer).
- 944 Theiss, J.C., Morris, N.R., and Fischer, G.A. (1976). Pyrimidine nucleotide  
945 metabolism in L5178Y murine leukemia cells: deoxycytidine protection from  
946 deoxyguanosine toxicity. *Cancer Biochem Biophys* 1, 211-214.
- 947 Uhlen, M., Fagerberg, L., Hallstrom, B.M., Lindskog, C., Oksvold, P., Mardinoglu, A.,  
948 Sivertsson, A., Kampf, C., Sjostedt, E., Asplund, A., *et al.* (2015). Proteomics.  
949 Tissue-based map of the human proteome. *Science* 347, 1260419.
- 950 Zimmermann, W., Chen, S.M., Bolden, A., and Weissbach, A. (1980). Mitochondrial  
951 DNA replication does not involve DNA polymerase alpha. *J Biol Chem* 255, 11847-  
952 11852.
- 953
- 954
- 955

956 **Figures and figure legends**

957

Figure 1

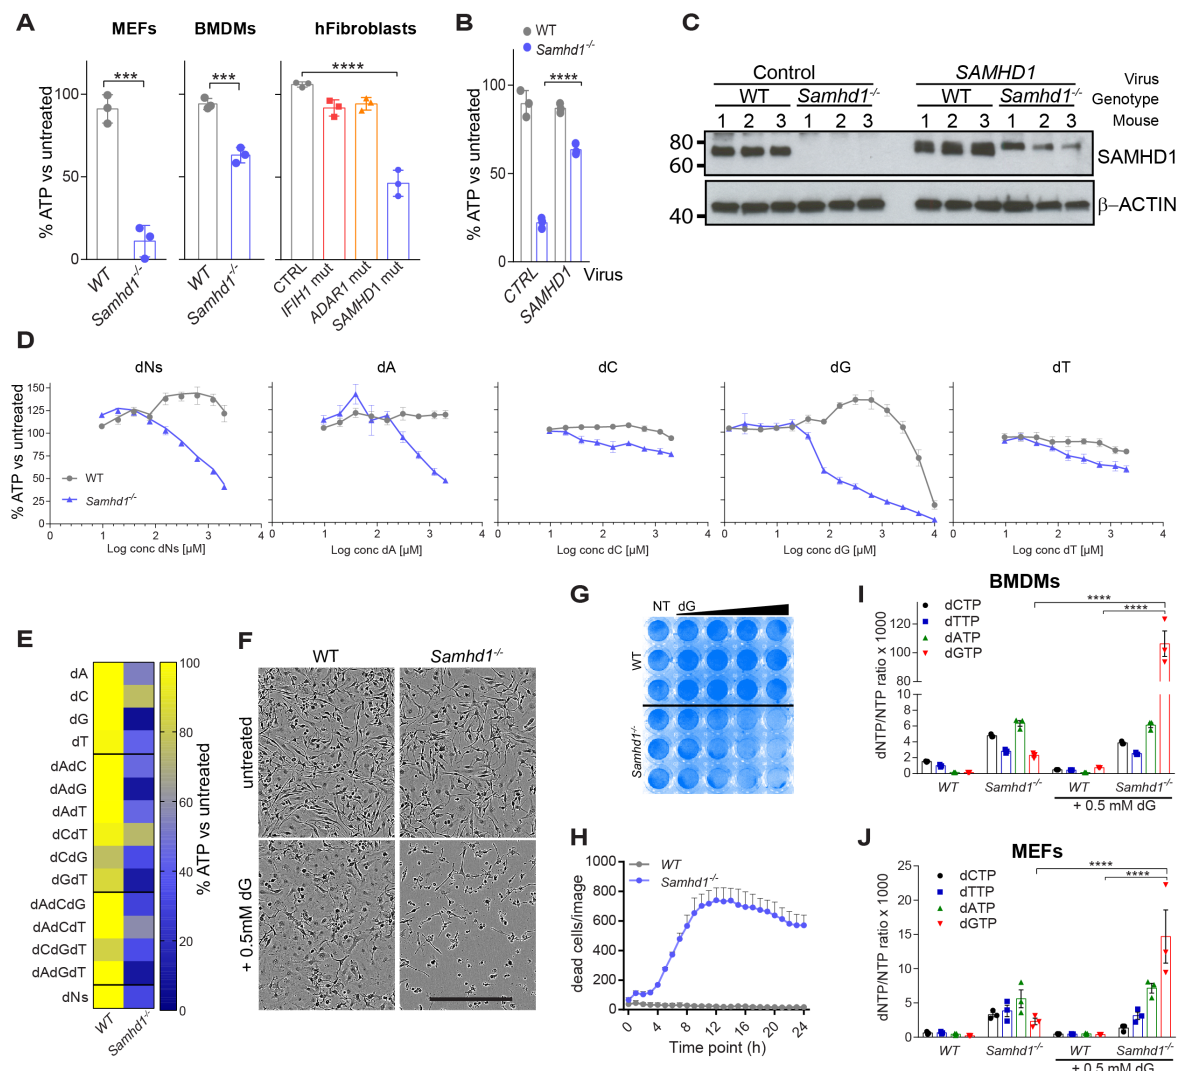

958

959

960 **Figure 1. Deoxyribonucleosides (dNs) are toxic in SAMHD1-deficient cells.**

961 (A) MEFs, BMDMs and AGS patient-derived fibroblasts were treated with a mix of all  
 962 four dNs. MEFs were cultured with 0.8 mM of each dN for 48 hours. BMDMs and  
 963 fibroblasts were treated with 0.5 mM of each dN for 24 hours. Cell viability was  
 964 determined by CellTiter-Glo assay. For each genotype, values from untreated control  
 965 cells were set to 100%. Data from triplicate measurements are shown with mean ±  
 966 SD. P-values determined with unpaired t-tests (MEFs and BMDMs) or one-way  
 967 ANOVA (fibroblasts) are indicated.

968 **(B,C)** SAMHD1 expression was reconstituted in *Samhd1*<sup>-/-</sup> BMDMs. Cells of the  
969 indicated genotype were infected with a retrovirus expressing SAMHD1 or empty  
970 control retrovirus. Cells were then treated with 0.5 mM of each dN for 24 hours. **(B)**  
971 Cell viability was tested as in **(A)**. Values from triplicate measurements are shown with  
972 mean  $\pm$  SD. P-values determined with two-way ANOVA are indicated. **(C)** SAMHD1  
973 expression was tested by western blot in BMDMs from three mice per genotype.  $\beta$ -  
974 Actin served as a loading control.

975 **(D)** BMDMs were treated with equimolar concentrations of all four dNs or with  
976 individual dNs at the indicated concentrations for 24 hours. Cell viability was tested as  
977 in **(A)**. Data from biological triplicates are shown as mean  $\pm$  SEM.

978 **(E)** BMDMs were treated with individual dNs and combinations of dNs. Cells were  
979 cultured with 0.5 mM of the indicated dN(s) for 24 hours and viability was analysed as  
980 in **(A)**. Data from biological triplicates were averaged and are represented as a heat  
981 map.

982 **(F)** BMDMs were treated with 0.5 mM dG for 24 hours. Brightfield images are shown.  
983 The scale bar represents 300  $\mu$ m.

984 **(G)** BMDMs were treated with increasing doses of dG for 24 hours, fixed and stained  
985 with crystal violet. The wedge denotes 0.2, 0.4, 0.8, 1.6 mM dG; NT, not treated.

986 **(H)** BMDMs were treated with 0.4 mM dG. Viability was monitored with the cell-  
987 impermeable dye Yoyo3 for 24 hours using an in-incubator imaging system (Incucyte).  
988 Yoyo3<sup>+</sup> cells were enumerated. Mean values from triplicate measurements are shown  
989  $\pm$  SD.

990 **(I,J)** BMDMs **(I)** and MEFs **(J)** were treated with 0.5 mM dG for 2 hours and intracellular  
991 dNTP levels were quantified relative to NTP levels. Data from three biological  
992 replicates are shown together with mean  $\pm$  SEM. P-values determined with two-way  
993 ANOVA are indicated.

994 Panels **A-C** and **F-H** are representative of at least three independent experiments. \*\*\*  
995  $p < 0.001$ ; \*\*\*\*  $p < 0.0001$ .

## Figure 2

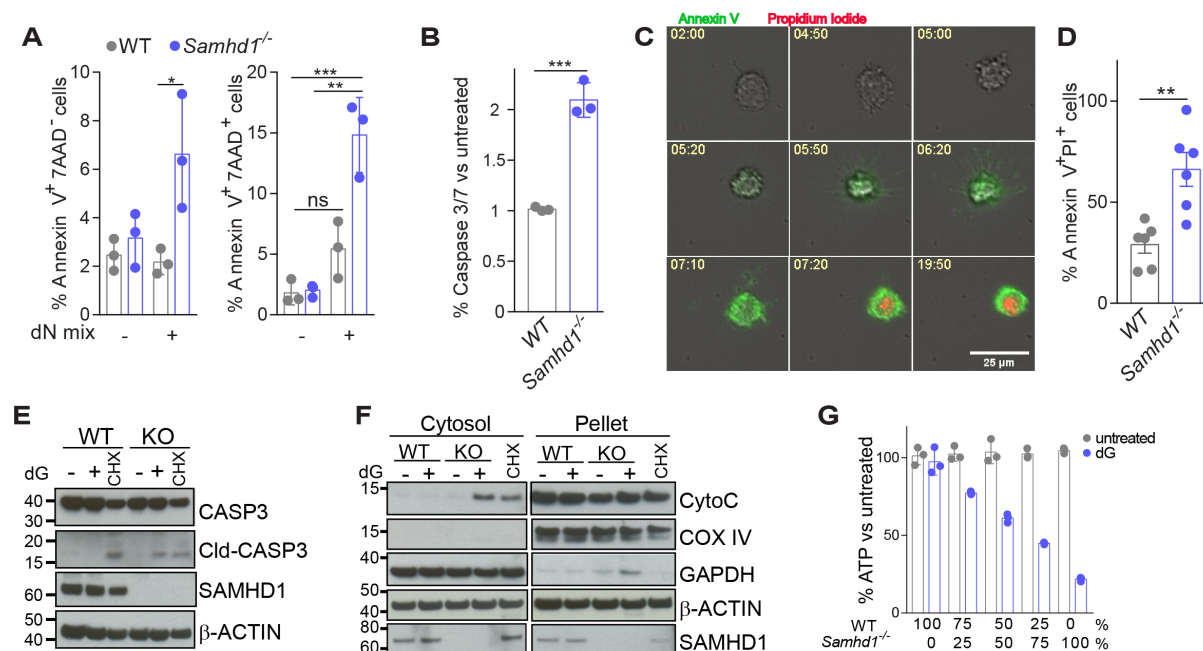

996

997

998 **Figure 2. dG treatment kills *Samhd1*<sup>-/-</sup> cells by apoptosis.**

999 (A) BMDMs were treated with 0.5 mM of each dN for 24 hours and stained with  
 1000 Annexin V and 7AAD. AnnexinV<sup>+</sup>7AAD<sup>-</sup> and AnnexinV<sup>+</sup>7AAD<sup>+</sup> cells were quantified by  
 1001 flow cytometry. Data from triplicate measurements are shown with mean ± SD. P-  
 1002 values determined with two-way ANOVA are indicated.

1003 (B) Caspase activity was assessed in BMDMs 6 hours after treatment with 0.5 mM dG  
 1004 using the Caspase Glo 3/7 assay. For each genotype, values from untreated control  
 1005 cells were set to 1. Data from triplicate measurements are shown with mean ± SD.  
 1006 The p-value determined with an unpaired t-test is indicated.

1007 (C,D) Live cell imaging of *Samhd1*<sup>-/-</sup> BMDMs treated with 0.5 mM dG. Alexa-488-  
 1008 labelled Annexin V and propidium iodide (PI) were added to the culture medium to  
 1009 visualise early apoptotic cells and cells that lost membrane integrity, respectively. (C)  
 1010 Representative images. Numbers show the time after dG exposure (hh:mm). (D)  
 1011 Enumeration of AnnexinV<sup>+</sup>PI<sup>+</sup> cells after 24 hours of treatment with 0.5 mM dG. Six  
 1012 images per condition were analysed and means ± SEM are shown. The p-value  
 1013 determined with an unpaired t-test is indicated.

1014 (E,F) BMDMs were treated with 0.5 mM dG or 1 μg/ml cycloheximide (CHX, added to  
 1015 WT cells in [F]) for 8 hours. (E) Levels of the indicated proteins in total cell extracts  
 1016 were determined by western blot. (F) Cells were fractionated into cytosol and a pellet

1017 containing organelles. Levels of the indicated proteins were determined by western  
1018 blot.  $\beta$ -Actin served as a loading control.

1019 **(G)** WT and *Samhd1*<sup>-/-</sup> BMDMs were co-cultured at the indicated ratios. Cell viability  
1020 was determined as in Figure 1A 24 hours after treatment with 0.5 mM dG. Data from  
1021 triplicate measurements are shown with mean  $\pm$  SD.

1022 Panels **A-G** are representative of at least three independent experiments. ns  $p \geq 0.05$ ;

1023 \*  $p < 0.05$ ; \*\*  $p < 0.01$ ; \*\*\*  $p < 0.001$ .

1024 See also Supplementary Figure 1.

1025



Figure 3

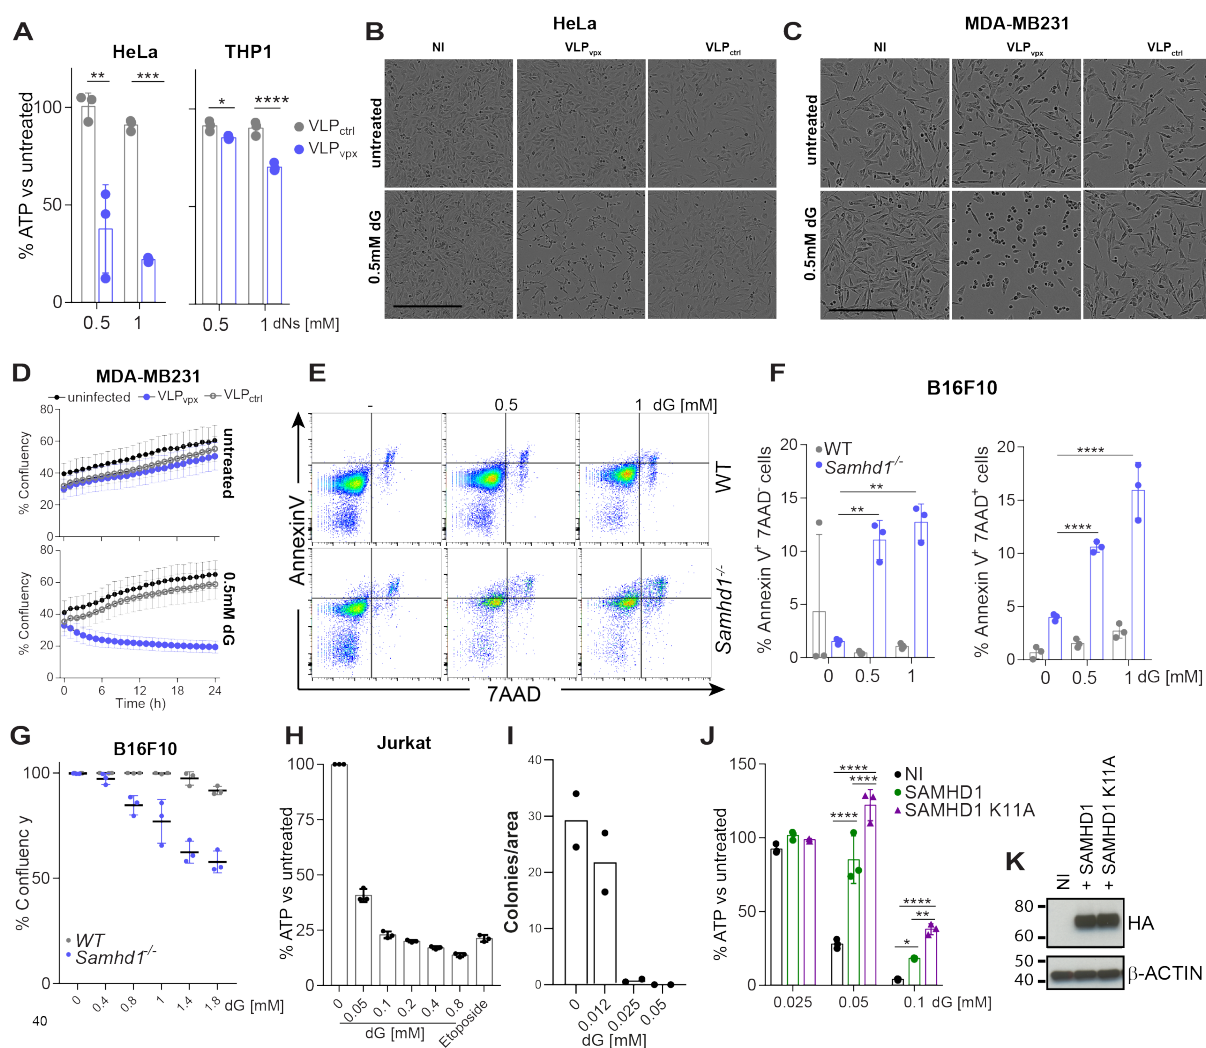

1026

1027

1028

**Figure 3. dG induces death of cancer cell lines.**

1029 (A) HeLa and THP1 cells were infected with VLPs containing Vpx (VLP<sub>vpx</sub>) or not  
 1030 (VLP<sub>ctrl</sub>). After 24 hours, cells were treated with 0.5 mM of each dN for an additional  
 1031 24 hours. Cell viability was assessed as in Figure 1A.

1032 (B,C) HeLa and MDA-MB231 cells were left un-infected (NI) or were infected with  
 1033 VLPs containing Vpx (VLP<sub>vpx</sub>) or not (VLP<sub>ctrl</sub>). After 24 hours, cells were treated with  
 1034 0.5 mM dG and brightfield images were acquired after an additional 10-12 hours. Scale  
 1035 bar represents 300 μm.

1036 (D) MDA-MB231 were treated as in (C) and confluency was monitored after dG  
 1037 addition using a live-cell imaging system in the incubator (Incucyte). The mean of 9  
 1038 measurements ± SD is shown.



1039 **(E-G)** Wild-type and *Samhd1*<sup>-/-</sup> B16F10 cells were treated with dG as indicated for 20  
1040 hours. **(E,F)** Cells were then stained with annexin V and 7AAD and analysed by flow  
1041 cytometry. Representative FACS plots are shown in panel **(E)** and Annexin V<sup>+</sup> 7AAD<sup>-</sup>  
1042 and Annexin V<sup>+</sup> 7AAD<sup>+</sup> cells were quantified in panel **(F)**. **(G)** Confluency was  
1043 determined as in panel **(D)**.

1044 **(H)** Jurkat cells were treated for 20 hours with dG as indicated or with 25  $\mu$ M etoposide.  
1045 Cell viability was determined as in Figure 1A.

1046 **(I)** Jurkat cells were treated with dG as indicated for 20 hours and were then seeded  
1047 in semi-solid medium containing dG. After 13 days, cell colonies were counted and  
1048 the number colonies per field of view is shown.

1049 **(J,K)** Jurkat cells were reconstituted with HA-tagged wild-type or K11A mutant  
1050 SAMHD1 using a lentivector. Un-infected cells (NI) served as control. **(J)** Cells were  
1051 then treated with dG for 48 hours. Cell viability was determined as in Figure 1A. **(K)**  
1052 SAMHD1 levels in total cell extracts were determined by western blot.  $\beta$ -Actin served  
1053 as a loading control.

1054 Panels **A**, **D-H** and **J-K** are representative of three independent experiments and  
1055 panels **B** and **C** of two experiments. In panels **A**, **F-H** and **J** dots represent technical  
1056 triplicates and means  $\pm$  SD are shown. In panel **I**, data from two independent  
1057 experiments were pooled and dots represent the mean of technical duplicates per  
1058 experiment. P-values determined with two-way ANOVA are indicated. \*  $p < 0.05$ ; \*\*  
1059  $p < 0.01$ ; \*\*\*  $p < 0.001$ ; \*\*\*\*  $p < 0.0001$ .

1060 See also Supplementary Figure 2.

1061

Figure 4

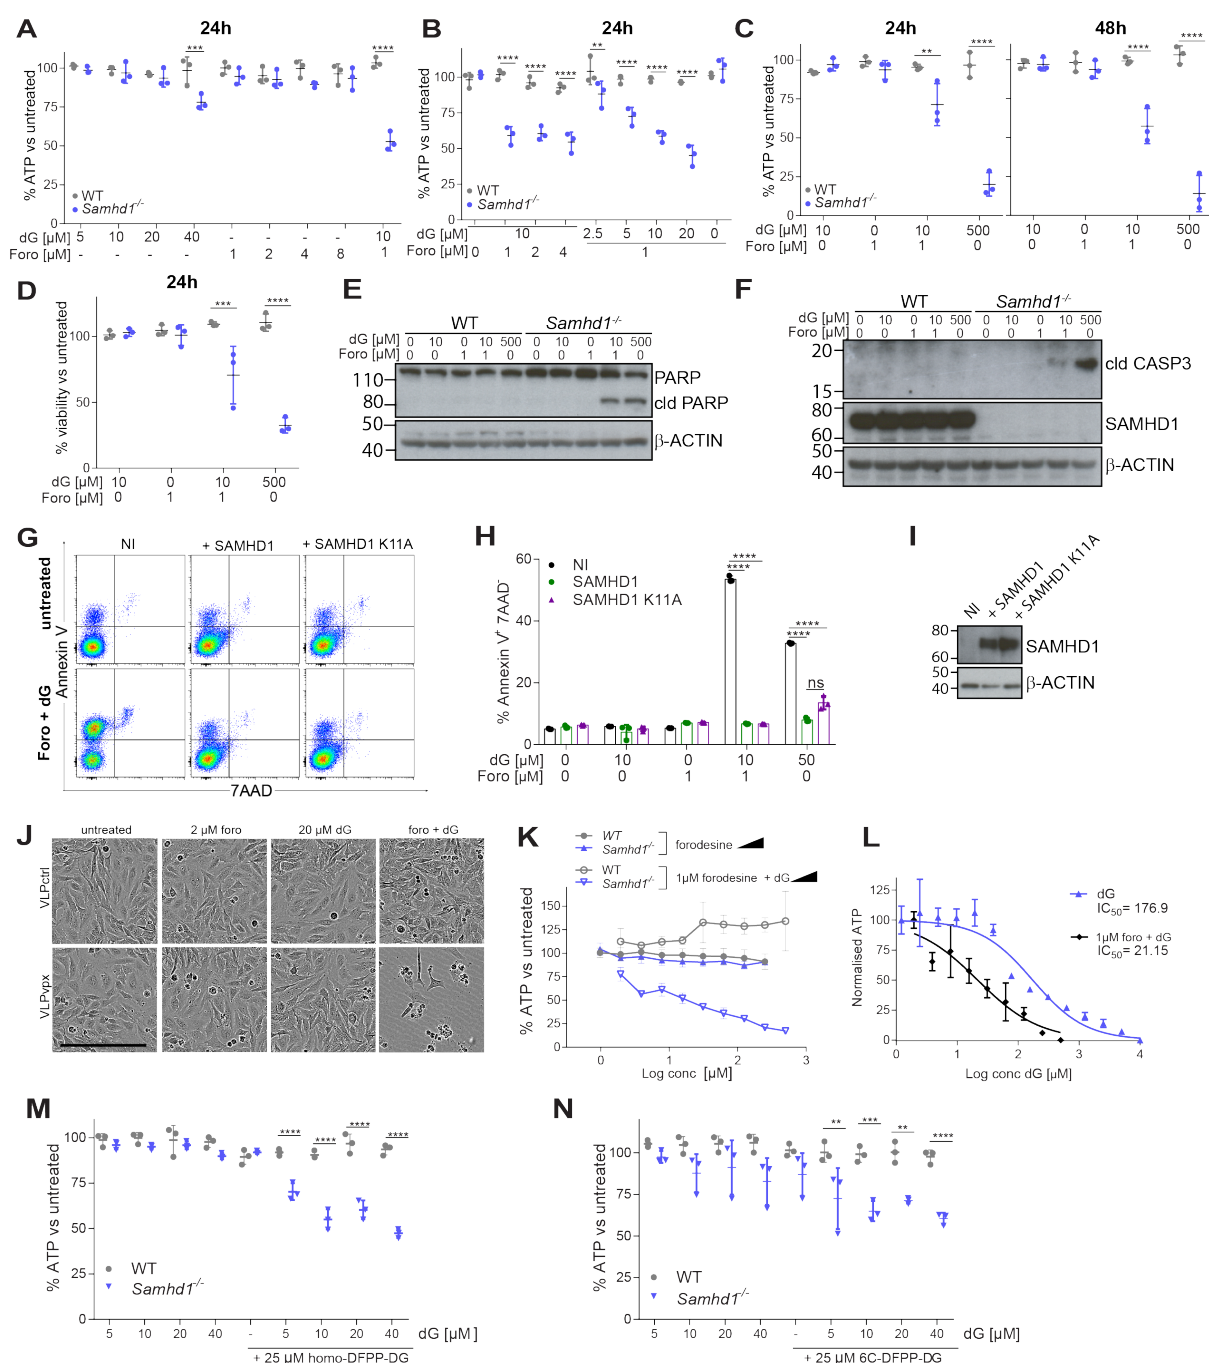

1062

1063

1064 **Figure 4. PNP inhibitors and dG synergistically induce cell death in cells lacking**  
 1065 **SAMHD1.**

1066 (A-C) BMDMs were treated with the indicated doses of dG and Forodesine. Viability  
 1067 was tested as in Figure 1A after 24 or 48 hours.

1068 (D) BMDMs treated for 24 hours with dG and Forodesine were fixed and stained with  
 1069 crystal violet. After washing, cell-associated dye was solubilised and quantified by

1070 absorbance at 570 nm. For each genotype, values from untreated control cells were  
1071 set to 100%.

1072 **(E-F)** BMDMs were treated for 8 hours with dG and Forodesine. Levels of the indicated  
1073 proteins in total cell extracts were determined by western blot.  $\beta$ -Actin served as  
1074 a loading control. cld, cleaved.

1075 **(G-I)** Jurkat cells were reconstituted with SAMHD1 as described in Figure 3J,K. Un-  
1076 infected cells (NI) served as control. **(G,H)** Cells were treated for 18 hours with 10  $\mu$ M  
1077 dG and 1  $\mu$ M forodesine. Cells were then stained with annexin V and 7AAD and  
1078 analysed by flow cytometry. Representative FACS plots are shown in panel **(G)** and  
1079 Annexin V<sup>+</sup> 7AAD<sup>-</sup> cells were quantified in panel **(H)**. **(I)** SAMDH1 levels in total cell  
1080 extracts were determined by western blot.  $\beta$ -Actin served as a loading control.

1081 **(J)** HeLa cells were infected with VLPs containing Vpx (VLP<sub>vpx</sub>) or not (VLP<sub>ctrl</sub>). After  
1082 6 hours, cells were treated with 20  $\mu$ M dG and 2  $\mu$ M forodesine and brightfield images  
1083 were acquired after an additional 48 hours. Scale bar represents 300  $\mu$ m.

1084 **(K)** BMDMs were treated with the indicated doses of dG and forodesine. Viability was  
1085 tested as in Figure 1A after 24 hours. Means from three biological replicates are shown  
1086  $\pm$  SEM.

1087 **(L)** *Samhd1*<sup>-/-</sup> BMDMs were treated with the indicated doses of dG in the presence or  
1088 absence of 1  $\mu$ M forodesine. Cell viability was determined by CellTiter-Glo assay after  
1089 24 hours. Data were normalised by setting the values for the lowest and highest dG  
1090 concentrations to 100 and 0, respectively. Means from three biological replicates are  
1091 shown  $\pm$  SEM. IC50 values were calculated from the non-linear regression curves  
1092 shown on the graph.

1093 **(M,N)** BMDMs were treated with the indicated doses of dG and homo-DFPP-DG **(M)**  
1094 or 6C-DFPP-DG **(N)**. Viability was tested as in Figure 1A after 24 hours.

1095 Data are representative of three independent experiments. In panels **A-D**, **M**, **N** and **H**  
1096 dots represent BMDMs from individual mice and technical replicates, respectively.  
1097 Mean  $\pm$  SD is shown. P-values determined with two-way ANOVA are indicated. \*\*  
1098  $p < 0.01$ ; \*\*\*  $p < 0.001$ ; \*\*\*\*  $p < 0.0001$

## Figure 5

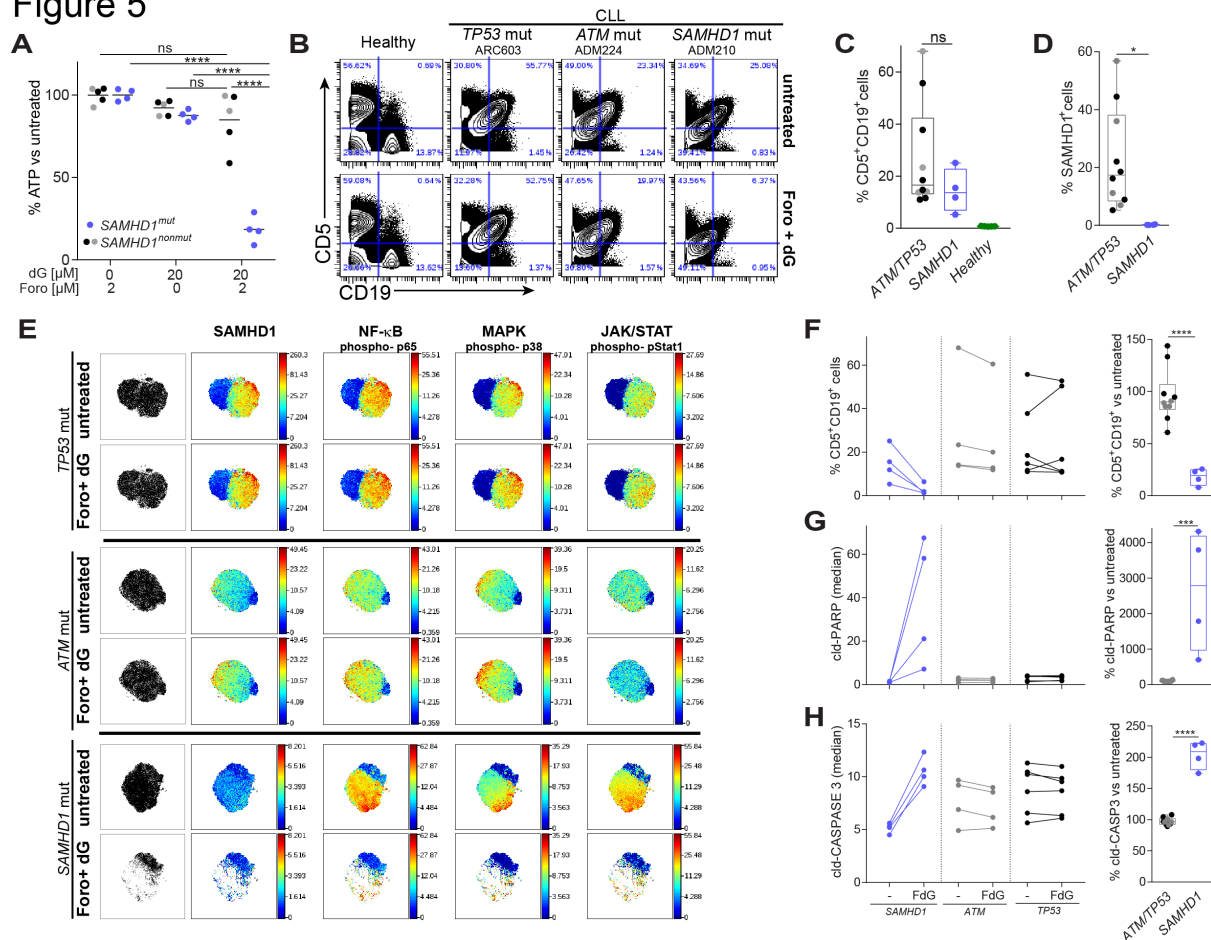

1099

1100

1101 **Figure 5. Elimination of *SAMHD1* mutated leukemic cells by Forodesine and dG**  
 1102 **treatment.**

1103 (A) PBMCs from patients with CLL were treated for 24 hours with dG and Forodesine  
 1104 as indicated. Viability was tested as in Figure 1A.

1105 (B-H) PBMCs from healthy control subjects and patients with CLL were treated or not  
 1106 for 24 hours with 20 μM dG and 2 μM Forodesine (Foro + dG). Cells were then  
 1107 analysed using CyTOF.

1108 (B) Live cells were gated (see Supplementary Figure 3C). The CD5 and CD19 staining  
 1109 is shown for selected samples (see Supplementary Figure 3D for all samples).

1110 (C) Percentages of untreated, live CD5<sup>+</sup>CD19<sup>+</sup> cells are shown.

1111 (D) *SAMHD1* expression was analysed in untreated, live CD5<sup>+</sup>CD19<sup>+</sup> cells and the  
 1112 percentage of *SAMHD1*<sup>+</sup> cells is shown (see Supplementary Figure 3C for gating).

1113 (E) Live CD5<sup>+</sup>CD19<sup>+</sup> cells from each sample were analysed separately by viSNE using  
 1114 22 lineage markers (Cytobank; settings: 1000 iterations, 30 perplexity and 0.5 theta).

1115 Representative tSNE plots are shown (see Supplementary Figure 4 for all samples)  
1116 and were coloured by expression or phosphorylation of the indicated markers.

1117 **(F)** Left, percentages of CD5<sup>+</sup>CD19<sup>+</sup> cells amongst all live cells are shown in untreated  
1118 and treated PBMC samples. FdG, treatment with 2  $\mu$ M forodesine and 20  $\mu$ M dG.  
1119 Right, the frequency of live CD5<sup>+</sup>CD19<sup>+</sup> cells was set to 100 in untreated samples and  
1120 their percentage after forodesine and dG treatment is shown.

1121 **(G,H)** The staining for cleaved PARP **(G)** and cleaved CASPASE3 **(H)** in live  
1122 CD5<sup>+</sup>CD19<sup>+</sup> cells was analysed. Left, median values are shown in untreated and  
1123 treated cells. Right, median values from untreated cells were set to 100 separately for  
1124 each sample.

1125 In panels **A**, **C**, **D** and **F-H** dots represent cells from different patients and the colour  
1126 indicates the mutation status (grey: *ATM*, black: *TP53*, blue: *SAMHD1*). Horizontal  
1127 bars represent means and in panels **C** and **D** box and whiskers show SD and  
1128 maximum/minimum values, respectively. P-values determined with two-way ANOVA  
1129 **(A)** or unpaired t-test **(C,D,F-H)** are indicated. ns  $p \geq 0.05$ ; \*  $p < 0.05$ ; \*\*  $p < 0.01$ ; \*\*\*  
1130  $p < 0.001$ ; \*\*\*\*  $p < 0.0001$ .

1131 See also Supplementary Figures 3-5.

1132

1133 **Supplementary Information**

1134

1135 **SAMHD1 limits the efficacy of forodesine in leukaemia by**  
1136 **protecting cells against cytotoxicity of dGTP**

1137 Tamara Davenne<sup>1,5</sup>, Jenny Klintman<sup>2</sup>, Sushma Sharma<sup>3</sup>, Rachel E. Rigby<sup>1</sup>, Chiara  
1138 Cursi<sup>1</sup>, Anne Bridgeman<sup>1</sup>, Bernadeta Dadonaite<sup>4</sup>, Kim De Keersmaecker<sup>5</sup>, Peter  
1139 Hillmen<sup>6</sup>, Andrei Chabes<sup>3</sup>, Anna Schuh<sup>2,7,8</sup> and Jan Rehwinkel<sup>1,\*</sup>

1140

1141 <sup>1</sup>Medical Research Council Human Immunology Unit, Medical Research Council  
1142 Weatherall Institute of Molecular Medicine, Radcliffe Department of Medicine,  
1143 University of Oxford, Oxford OX3 9DS, UK.

1144 <sup>2</sup>Molecular Diagnostic Centre, Department of Oncology, University of Oxford, Oxford,  
1145 UK.

1146 <sup>3</sup>Department of Medical Biochemistry and Biophysics and Laboratory for Molecular  
1147 Infection Medicine Sweden (MIMS), Umeå University, Umeå, Sweden.

1148 <sup>4</sup>Sir William Dunn School of Pathology, University of Oxford, South Parks Road,  
1149 Oxford OX1 3RE, UK.

1150 <sup>5</sup>Laboratory for Disease Mechanisms in Cancer, Department of Oncology, KU Leuven  
1151 and Leuven Cancer Institute (LKI), Herestraat 49, 3000 Leuven, Belgium.

1152 <sup>6</sup>St James' Institute of Oncology, St James' University Hospital, Leeds, UK.

1153 <sup>7</sup>Department of Oncology, Old Road Campus Research Building, University of Oxford,  
1154 OX3 7DQ, UK.

1155 <sup>8</sup>Department of Haematology, Oxford University Hospitals NHS Trust, Oxford, UK.

1156

1157 \* Correspondence: [jan.rehwinkel@imm.ox.ac.uk](mailto:jan.rehwinkel@imm.ox.ac.uk); +44 1865 222362

1158



1159 **Supplementary figures**

1160

Supplementary figure 1

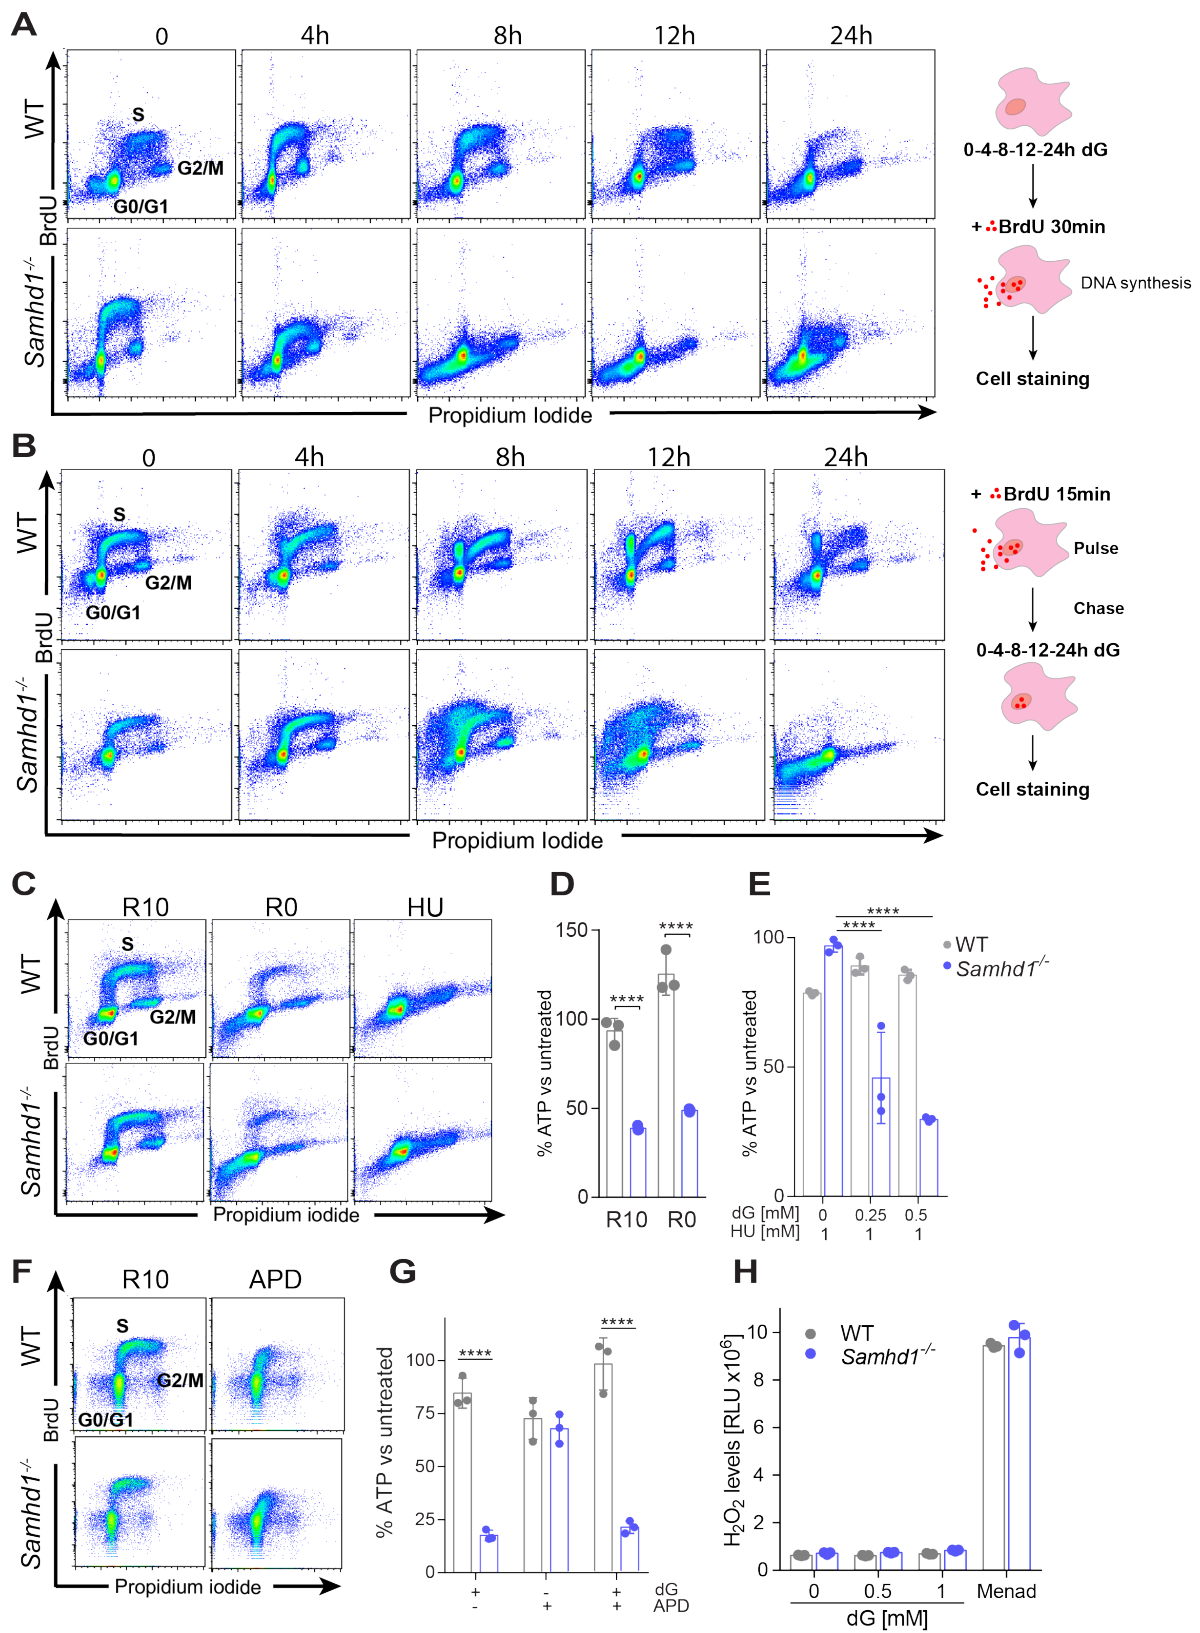

1161

1162

1163 **Supplementary Figure 1. dG-induced cell death in *Samhd1*<sup>-/-</sup> cells is independent**  
1164 **of nuclear DNA replication, related to Figure 2.**

1165 (A) BMDMs were treated with 0.5 mM dG for the indicated periods of time. Cells were  
1166 then labelled with BrdU for 30 minutes and fixed. Cells were stained using  $\alpha$ -BrdU  
1167 antibody and PI and analysed by flow cytometry.

1168 (B) BMDMs were labelled with BrdU for 15 minutes and then treated with 0.5 mM dG  
1169 for the indicated periods of time. Cells were then analysed as in (A).

1170 (C-E) After 7 days of conventional culture, BMDMs were grown in medium containing  
1171 10% FCS (R10) or in serum-free medium (R0) for 24 hours. Alternatively, BMDMs  
1172 were treated with 1 mM hydroxyurea (HU) for 8 hours. (C) Cells were analysed as in  
1173 (A). (D) Cells were treated with 0.5 mM dG for 24 hours and viability was analysed as  
1174 described in Figure 1A. (E) Cells were treated with 0.5 mM dG for 16 hours and viability  
1175 was analysed as described in Figure 1A.

1176 (F-G) BMDMs were treated or not with 1  $\mu$ M of aphidicolin (APD) in R10 for 16 hours.  
1177 (F) Cells were analysed as in (A). (G) Cells were treated with 0.5 mM dG for 24 hours  
1178 and viability was analysed as described in Figure 1A.

1179 (H) H<sub>2</sub>O<sub>2</sub> production was measured using the ROS-Glo H<sub>2</sub>O<sub>2</sub> assay (Promega).  
1180 BMDMs were treated with the indicated concentrations of dG for 3 hours. The H<sub>2</sub>O<sub>2</sub>  
1181 substrate solution was then added for 6 hours. Control cells were treated with 20  $\mu$ M  
1182 Menadione (Menad) during this period. Luminescence was measured after addition of  
1183 the detection solution.

1184 Data are representative of three (A-G) or two (H) independent experiments,  
1185 respectively. In panels D-E and G-H data from triplicate measurements are shown with  
1186 mean  $\pm$  SD. P-values determined with two-way ANOVA are indicated. \*\*\*\* p<0.0001.

1187

## Supplementary figure 2

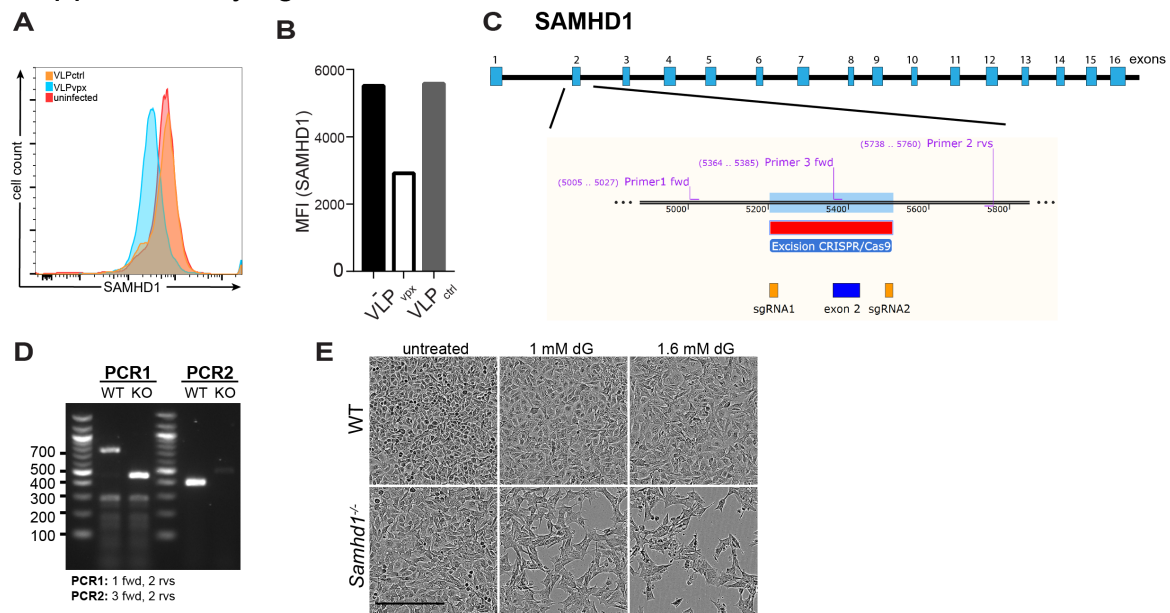

1188

1189

1190 **Supplementary Figure 2. Validation of SAMHD1-deficient cells, related to Figure**

1191 **3.**

1192 **(A,B)** HeLa treated as described in Figure 3A,B were stained with  $\alpha$ -SAMHD1  
1193 antibody and analysed by flow cytometry. Data are represented as histograms **(A)** and  
1194 the mean fluorescence intensity (MFI) of the SAMHD1 signal is shown in **(B)**.

1195 **(C,D)** Representation of the CRISPR/Cas9 strategy to generate B16F10 *Samhd1*<sup>-/-</sup>  
1196 cells used in Figure 3E-G. The knock-out of *Samhd1* exon 2 was validated by PCR  
1197 using the indicated primers **(D)**.

1198 **(E)** Brightfield images of WT and *Samhd1*<sup>-/-</sup> B16F10 cells 20 hours after treatment with  
1199 dG from the experiment in Figure 3G are shown. The scale bar represents 300  $\mu$ m.

1200 Panels **A,B** and **E** are representative of three independent experiments, respectively.

1201

## Supplementary figure 3

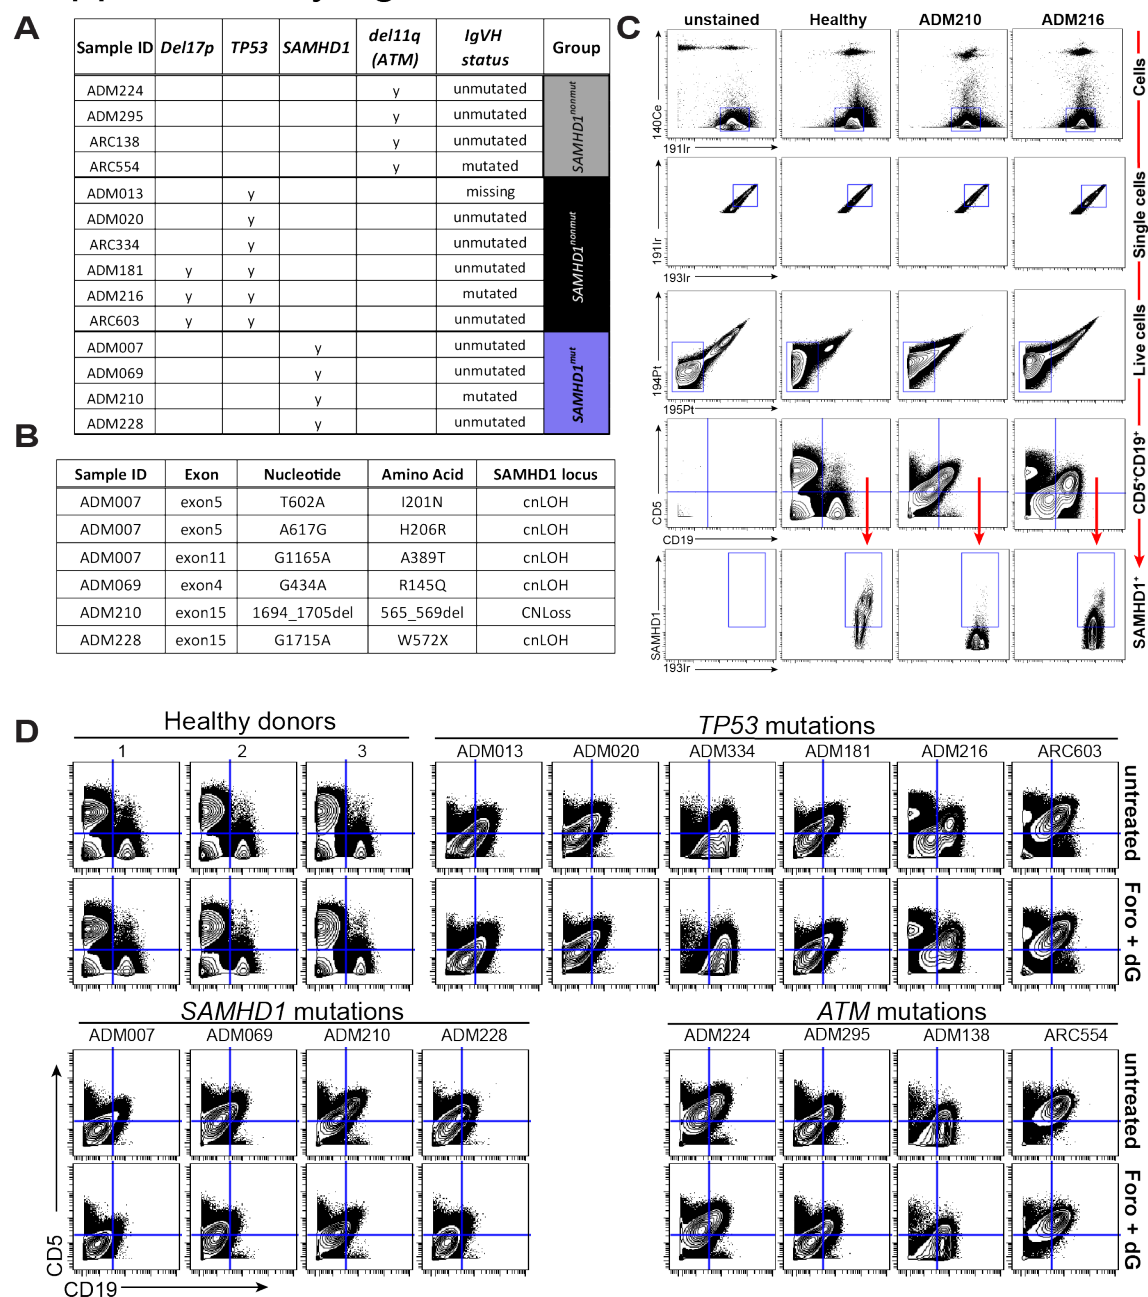

1202

1203

1204

### Supplementary Figure 3. CyTOF analysis, related to Figure 5.

1205 (A) List of CLL samples and mutation status. CLL samples carrying either *TP53*  
 1206 lesions (*Del17p* or mutation) or *ATM* lesions (*Del11q*) served as controls for *SAMHD1*  
 1207 mutated samples. *IgVH*, immunoglobulin variable heavy chain gene.

1208 (B) Details of *SAMHD1* mutations. cnLOH, copy neutral loss of heterozygosity;  
 1209 CNLoss, copy number loss.

1210 (C) CyTOF gating strategy for the experiment shown in Figure 5. In brief, the 140Ce  
 1211 channel was used to exclude calibration beads. The 191Ir and 193Ir channels detect

1212 cells labelled with an intercalator and were used to identify single cells. The 194Pt and  
1213 195Pt channels were used to remove dead (cisplatin-labelled) cells from subsequent  
1214 analysis of CD5, CD19 and SAMHD1 expression.

1215 **(D)** Expression of CD5 and CD19 is shown as in Figure 5B for all analysed samples.

1216

## Supplementary figure 4

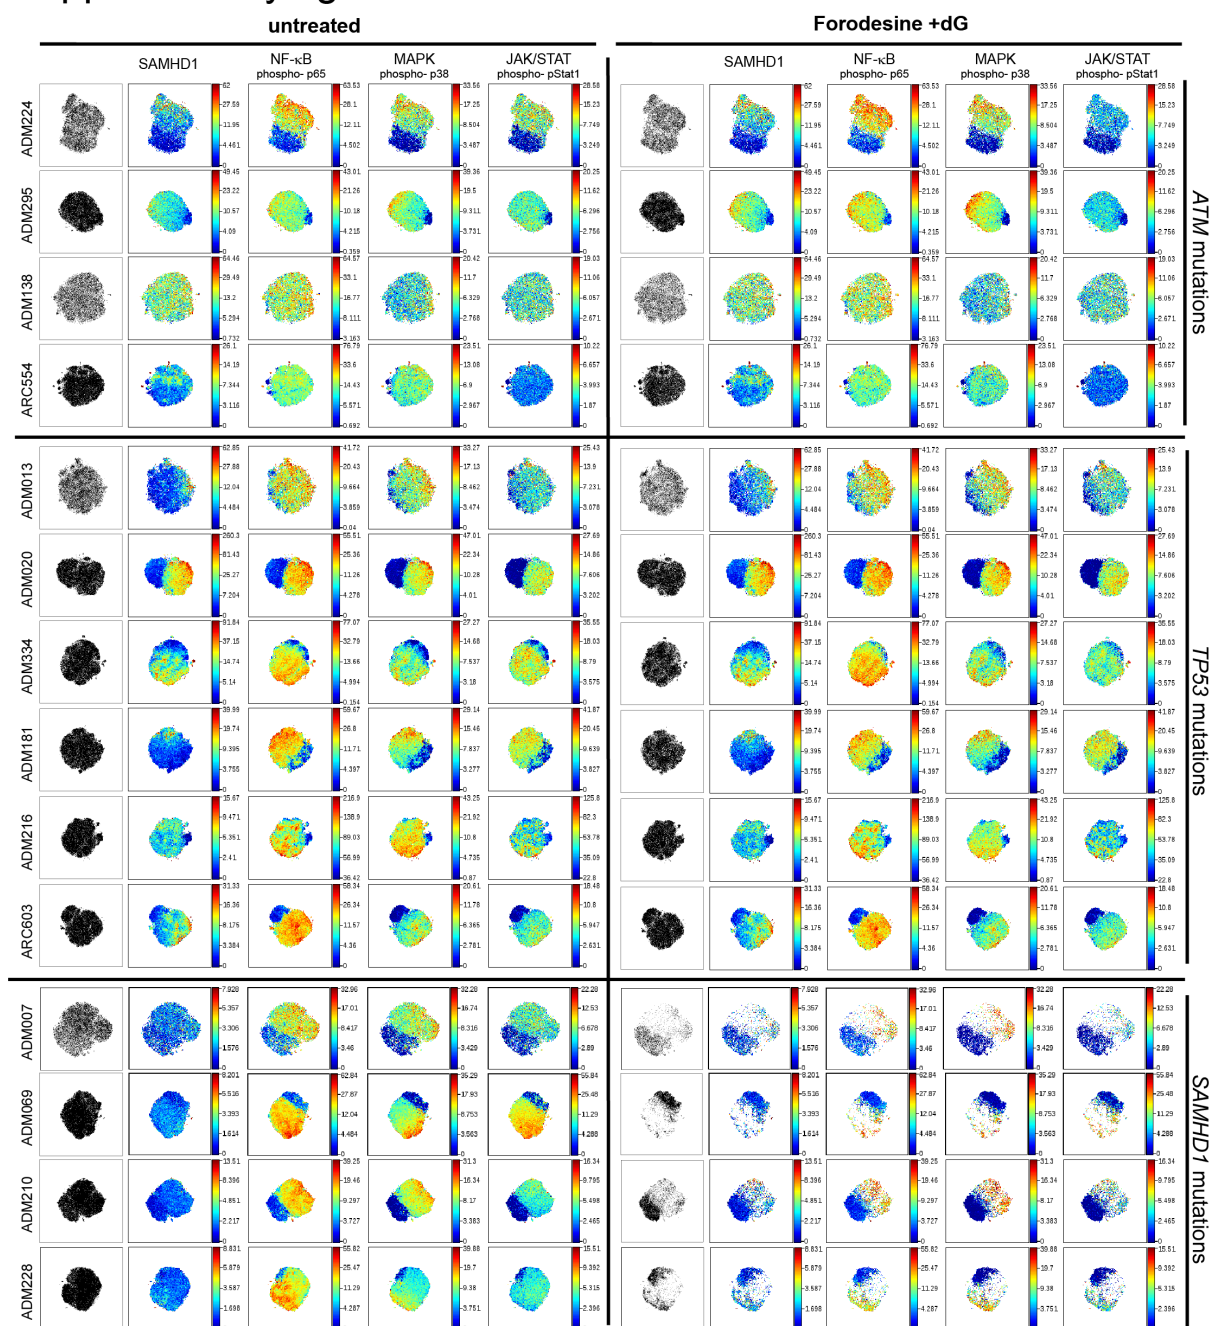

1217

1218

1219 **Supplementary Figure 4. CLL patient cells with *SAMHD1* mutation are more**  
 1220 **sensitive to Forodesine and dG treatment, related to Figure 5.**

1221 CyTOF data from each sample were analysed separately by viSNE analysis as  
 1222 described in Figure 5E. Data from all patients studied are shown; for completeness,  
 1223 we included here those selected for Figure 5E.

1224



## Supplementary figure 5

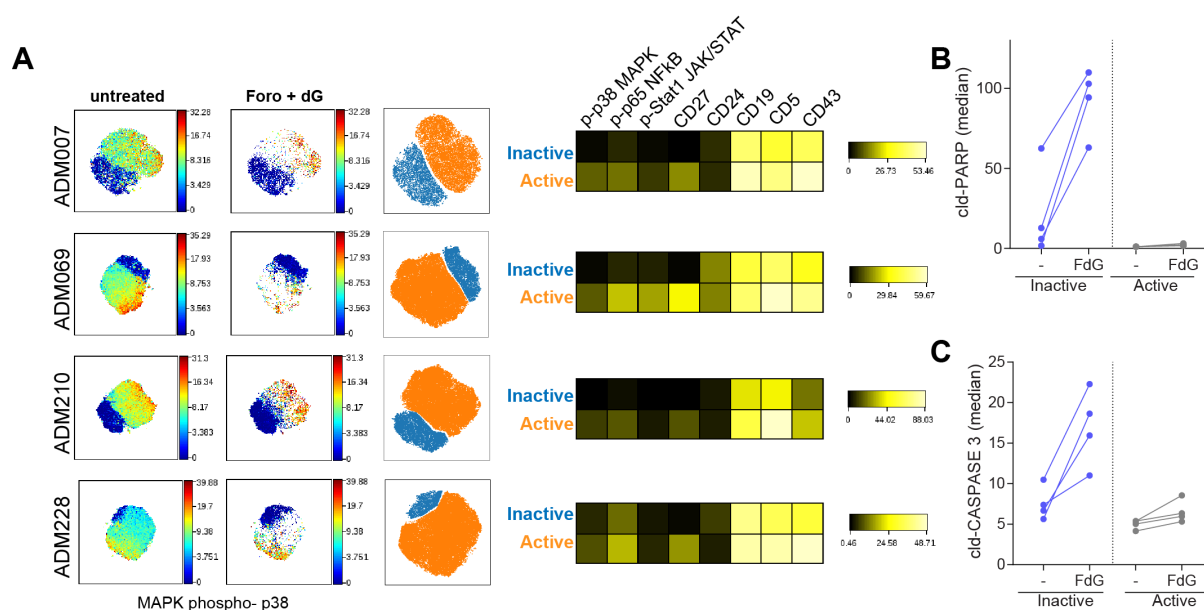

1238 **Supplementary tables**

1239 **Supplementary Table 1. Reagents**

1240

| Reagent                                              | Source                    | Identifier        |
|------------------------------------------------------|---------------------------|-------------------|
| <b>Antibodies</b>                                    |                           |                   |
| Anti-hSAMHD1 (mouse polyclonal)                      | Abcam                     | #ab67820          |
| Anti-mSAMHD1 (Rabbit)                                | (Rehwinkel et al., 2013)  | n/a               |
| Anti-mouse AF594 (goat)                              | Life technologies         | #A-11005          |
| Anti-Caspase 3                                       | Cell Signaling            | #9661T            |
| Anti-cytochrome C                                    | BD                        | #556433           |
| Anti-β-actin HRP                                     | Sigma                     | #A3854            |
| Anti-Rabbit HRP                                      | GE-Healthcare             | #NA934V           |
| Anti-Mouse HRP                                       | GE-Healthcare             | #NA931V           |
| Anti-gapdh                                           | proteintech               | #HRP-60004        |
| Anti-COX IV                                          | Cell Signaling            | #11967S           |
| Anti-HA HRP                                          | Cell Signaling            | #2999S            |
| Anti-PARP                                            | Cell Signaling            | #9542P            |
| Anti-Annexin V AF488                                 | Life technologies         | #A13201           |
| Anti-BrdU AF488                                      | Biologend                 | #364106           |
| <b>Critical commercial assays</b>                    |                           |                   |
| FITC annexinV / 7AAD detection kit                   | Biologend                 | #640922           |
| Mouse TNF alpha ELISA Ready-SET-Go!                  | eBioscience               | #88-7324-88       |
| CellTiter-Glo Luminescent Cell Viability Assay       | Promega                   | #G7571            |
| Caspase Glo 3/7                                      | Promega                   | #G6320            |
| TaqMan™ Universal PCR Master Mix                     | Thermofisher              | #4304437          |
| ROS-Glo H <sub>2</sub> O <sub>2</sub> assay          | Promega                   | #G8820            |
| <b>Chemicals, Peptides, and Recombinant Proteins</b> |                           |                   |
| Hydroxyurea                                          | Sigma                     | #H8627-5G         |
| 2'-deoxyadenosine monohydrate                        | Sigma                     | #D8668-1G         |
| 2'-deoxythymidine                                    | Sigma                     | #T1895-1G         |
| 2' deoxyguanosine                                    | MedChemexpress LLC        | #HY-17563         |
| 2'-deoxycytidine hydrochloride                       | MedChemexpress LLC        | #HY-17564         |
| Etoposide                                            | Sigma                     | #E1383-25MG       |
| Forodesine hydrochloride                             | MedChemexpress LLC        | #HY-16209         |
| Benzonase                                            | Sigma                     | #E8263-5KU        |
| Z-VAD-FMK                                            | Enzo Life Sciences        | #ALX-260-020-M005 |
| ODN 2088 Control (ODN 20958)                         | Miltenyi Biotec Ltd       | #130-105-821      |
| Imiquimod (R837)                                     | Invivogen                 | #tlrl-imqs        |
| Recombinant Murine TNF                               | Peptotech                 | #315-01A          |
| GSK872                                               | Merck chemicals           | #5303890001       |
| YOYO-3 Iodide                                        | Life technologies         | #Y3606            |
| Clariom™ S Assay HT                                  | Thermofisher              | #902971           |
| Pepsin                                               | Sigma                     | #77160            |
| FxCycle PI/RNase Staining Solution-100 mL            | Life technologies         | #F10797           |
| Protease inhibitors                                  | Cell signaling            | #871S             |
| Phosphatase inhibitors                               | Sigma                     | #P0044            |
| Sample buffer                                        | Life technologies         | # NP0007          |
| Novex protein standard                               | Life technologies         | #LC5800           |
| MOPS running buffer                                  | Life technologies         | #NP001            |
| MES running buffer                                   | Life technologies         | #NP001            |
| NuPAGE™ Antioxidant                                  | Life technologies         | #NP0005           |
| Ponceau                                              | Sigma                     | #P7170            |
| Tween20                                              | Sigma                     | #P1379            |
| ECL                                                  | Perkin Elmer              | #NEL104001EA      |
| ECL prime                                            | Sigma                     | #GERPN2232        |
| Digitonin                                            | Life technologies         | #BN2006           |
| Crystal violet                                       | Sigma                     | #HT90132          |
| Propidium iodide                                     | Sigma                     | #P4170            |
| 4-12% Bis Tris protein gel                           | Life technologies         | #NP0321BOX        |
| FcR block                                            | eBiosciences              | #14-9161-73       |
| Aphidicolin                                          | Insight Biotechnology Ltd | #sc-201535        |
| Menadione                                            | Fluorochem                | #049845-1g        |
| MethoCult                                            | Stemcell technologies     | #04100            |
| Glutamax                                             | Thermofisher              | #35050061         |
| IMDM                                                 | Thermofisher              | #12440053         |
| Primocin                                             | Invivogen                 | #ant-pm-1         |
| <b>Plasmids</b>                                      |                           |                   |
| pSIV3+                                               | (Negre et al., 2000)      | n/a               |

|                                                  |                                   |                                                                   |
|--------------------------------------------------|-----------------------------------|-------------------------------------------------------------------|
| pSIV4+                                           | (Negre et al., 2000)              | n/a                                                               |
| pCMV-VSVG                                        | (Rehwinkel et al., 2013)          | n/a                                                               |
| pCSHAwtW                                         | (Schaller et al., 2014)           | n/a                                                               |
| pCSHAk11aW                                       | (Schaller et al., 2014)           | n/a                                                               |
| p8.91 (packaging plasmid)                        | (Rehwinkel et al., 2013)          | n/a                                                               |
| pMSCVpuro-mSAMHD1                                | Generated in this study           | n/a                                                               |
| pMSCVpuro                                        | Clontech                          | #634401                                                           |
| pX458-Ruby                                       | (Hertzog et al., 2018)            | n/a                                                               |
| pX458                                            | Addgene                           | #48138, deposited by Dr. Feng Zhang                               |
| pX458-Ruby-sgRNA-1                               | Generated in this study           | n/a                                                               |
| pX458-sgRNA-2                                    | Generated in this study           | n/a                                                               |
| <b>Oligonucleotides</b>                          |                                   |                                                                   |
| mSAMHD1 sgRNA1 fwd:<br>CACCGgaggaactgtagctgtaca  | WIMM, Genome Engineering facility | n/a                                                               |
| mSAMHD1 sgRNA1 rvs:<br>AAACgttacagctaccagtctcctC | WIMM, Genome Engineering facility | n/a                                                               |
| mSAMHD1 sgRNA 2 fwd:<br>CACCGggtgaacccaagctctt   | WIMM, Genome Engineering facility | n/a                                                               |
| mSAMHD1 sgRNA 2 rvs:<br>AAACaagagcttggggtcacc    | WIMM, Genome Engineering facility | n/a                                                               |
| Primer 1 fwd : tgacagttgcatctaacctctg            | In-house                          | n/a                                                               |
| Primer 2 rvs : tgacagttgcatctaacctctg            | In-house                          | n/a                                                               |
| Primer 3 fwd : tgacagttgcatctaacctctg            | In-house                          | n/a                                                               |
| <b>Softwares and algorithms</b>                  |                                   |                                                                   |
| Graph pad prism 7                                | GraphPad softwares                |                                                                   |
| FlowJo V10                                       | FlowJo, LLC                       | <a href="https://www.flowjo.com/">https://www.flowjo.com/</a>     |
| Cytobank                                         |                                   | <a href="https://www.cytobank.org/">https://www.cytobank.org/</a> |
| <b>Other</b>                                     |                                   |                                                                   |
| Incucyte Live analysis system                    | Saortorius                        | N/A                                                               |
| Attune Nxt flow cytometer                        | BD                                | N/A                                                               |
| BD LSR II flow cytometer                         | BD                                | N/A                                                               |
| Glo-Max multi detection system                   | Promega                           | N/A                                                               |

1241

1242

1243

1244

1245

## Supplementary Table 2. CyTOF antibody panel

| Target          | Clone      | Company    | Catalog    | Location      |
|-----------------|------------|------------|------------|---------------|
| CD45            | HI30       | Fluidigm   | 3089003B   | surface       |
| CD11c           | Bu15       | Biologend  | 337221     | surface       |
| CD11b (Mac-1)   | ICRF44     | Biologend  | 301337     | surface       |
| CD4             | RPA-T4     | Fluidigm   | 3145001B   | surface       |
| CD20            | 2H7        | Fluidigm   | 3147001B   | surface       |
| CD56 (NCAM)     | NCAM16.2   | Fluidigm   | 3149021B   | surface       |
| CD123           | 6H6        | Biologend  | 306027     | surface       |
| CD27            | O323       | Biologend  | 302839     | surface       |
| CD38            | HIT2       | Biologend  | 303535     | surface       |
| CD45RA          | HI-100     | Biologend  | 304143     | surface       |
| CD14            | M5E2       | Fluidigm   | 3160001B   | surface       |
| CD23            | EBVCS-5    | Fluidigm   | 3164018B   | surface       |
| CD197 (CCR7)    | G043H7     | Fluidigm   | 3167009A   | surface       |
| CD8a            | SK1        | Fluidigm   | 3168002B   | surface       |
| CD24            | ML5        | Fluidigm   | 3169004B   | surface       |
| CD3             | UCHT1      | Fluidigm   | 3170001B   | surface       |
| CD19            | HIB19      | Biologend  | 302247     | surface       |
| CD5             | UCHT2      | Biologend  | 300627     | surface       |
| HLA-DR          | L243       | Fluidigm   | 3174001B   | surface       |
| CD194 (CCR4)    | 205410     | Fluidigm   | 3175021A   | surface       |
| CD43            | eBio84-3C1 | Invitrogen | 14-0439-82 | surface       |
| CD16            | 3G8        | Fluidigm   | 3209002B   | surface       |
| cld-CASP3       | 5AE1       | Fluidigm   | 3172023A   | intracellular |
| cld-PARP        | F21-852    | Fluidigm   | 3143011C   | intracellular |
| pStat1 [Y701]   | 4a         | Fluidigm   | 3153005A   | intracellular |
| p38 [T180/Y182] | D3F9       | Fluidigm   | 3156002A   | intracellular |
| SAMHD1          | polyclonal | Abcam      | Ab67820    | intracellular |
| pNFκBp65 [S529] | K10x       | Fluidigm   | 3166006A   | intracellular |

1246

1247
